# Supplementary material for: Prognostic implication of dynamic platelet count in lung cancer patients with thrombocytosis: a retrospective analysis
Source: PeerJ. 2025 Jun 17;13:e19551. doi: 10.7717/peerj.19551 (PMC12180448; doi:10.7717/peerj.19551)
Supplement: Supplemental Information 1 [file peerj-13-19551-s001.xlsx]

## Sheet: 计数
Group number	Group	Serial number	Gender	Age	Histology	Mutation	PDL1	Stage	Staging figure	Metastatic site	Elevated time	Count	MPV	PDW	lymphocyte	neutrophil	D-dimer	NLR	PLR	Time to platelet elevation	Treatment	PFS	DFS	PFS/days	DFS/days	Dynamic change in platelet count	Follow-up time	Danymic type
1	elevated group	1	Female	54	Adenocarcinoma	ALK+		IV	4	Bone	2016-08-16	348	10	11.8	1.33	2.95	0.38	2.21805	261.654	Third-line or later treatment	Chemotherapy	16months		480	0	Fluctuation	44months	Fluctuation
1	elevated group	2	Male	62	SCLC			IV	4	Bone，lymph nodes	2014-01-26	460	8.6	9.1	2.41	16.51	2.85	6.85062	190.871	Diagnosis	Chemotherapy	7months		210	0	Peak	12months	Peak
1	elevated group	3	Male	60	Squamous	21L858R		IV	4	Bone	2018-06-01	327	9.2	10.8	1.38	8.12	0.8	5.88406	236.957	Diagnosis	Targeted therapy+radiotherapy	6months		180	0	Fluctuation	14months	Fluctuation
1	elevated group	4	Female	59	Adenocarcinoma	ALK+		IV	4	Liver、lymph nodes	2019-09-16	422	9.9	10.7	1.02	7.72	0.74	7.56863	413.725	Progression after first-line treatment	Antiangiogenesis+Chemo	7months		210	0	Peak	25months	Peak
1	elevated group	5	Male	64	SCLC			IV	4	Lung	2019-10-19	335	9.7	10.2	0.97	8.42	0.51	8.68041	345.361	First-line treatment	Chemotherapy	5.5months		165	0	Peak	10months	Peak
1	elevated group	6	Female	55	Adenocarcinoma			II	2		2019-07-22	327	8.5	8.5	2.666	4.51	2.6	1.69167	122.656	Adjuvant treatment	Chemotherapy		DFS 10months	0	300	Peak	10months	Peak
1	elevated group	7	Male	66	Adenocarcinoma			IV	4	Bone、Liver、Adrenal gland、Pleura	2022-07-23	345	9.6	10.4	0.98	5.57	2.61	5.68367	352.041	Diagnosis	Chemotherapy	/		0	0		2week
1	elevated group	8	Male	62	Adenocarcinoma	19del		IV	4	Pleura	2020-04-08	343	10.3	11.3	1.23	2.83	0.37	2.30081	278.862	First-line treatment	Antiangiogenesis+Targeted therapy	17months		510	0	Peak	49months	Peak
1	elevated group	9	Male	65	SCLC			IV	4	lymph nodes	2020-05-11	355	9.2	10.1	0.44	5.88	1.2	13.3636	806.818	First-line treatment	Immunotherapy+ Chemo	4months		120	0	Peak/Sustained45days	283days	Peak
1	elevated group	10	Male	69	Squamous			IV	4	Lung、Liver	2023-03-27	351	9.6	10.5	1.26	6.55	0.83	5.19841	278.571	progression after third-line or later treatment	Immunotherapy			0	0		43months
1	elevated group	11	Female	59	Adenocarcinoma			IV	4	Lung、Pleura、Bone	2021-06-15	455	9.3	9.2	1.87	6.77	2.54	3.62032	243.316	progression after third-line or later treatment				0	0		4years
1	elevated group	12	Male	65	SCLC			IV	4	Lung	2019-06-04	377	9.2	8.7	1.22	0.37	0.66	0.303279	309.016	First-line treatment	Chemotherapy	9months		270	0	Sustained	21months	Sustained
1	elevated group	13	Male	56	Adenocarcinoma			IV	4	Brain、Bone	2019-12-05	439	8.5	8.1	1.49	9.1	0.34	6.10738	294.631	Diagnosis	Antiangiogenesis+Targeted therapy	3months8days		98	0	Fluctuation	132days	Fluctuation
1	elevated group	14	Male	74	Squamous			IV	4	Chest wall、Lung、Bone	2021-02-02	310	10.1	9.8	1.16	6.39	0.38	5.50862	267.241	Progression after first-line treatment	Antiangiogenesis+immuno	5months		150	0	Sustained	15months	Sustained
1	elevated group	15	Female	47	Adenocarcinoma			IV	4	Pleura、Chest wall	2018-03-06	331	9.5	12.2	1.27	2.34	0.24	1.84252	260.63	Diagnosis	Chemotherapy	11months		330	0	Peak	4years5months	Peak
1	elevated group	16	Male	54	SCLC			IV	4	Brain	2020-01-21	347	9.2	10.1	1.87	6.01	1.19	3.2139	185.561	Diagnosis	Chemotherapy	3months14days		104	0	Peak	4months	Peak
1	elevated group	17	Female	53	Adenocarcinoma			II	2		2020-01-16	354	9.1	9.9	1.66	1.99	0.76	1.1988	213.253	Adjuvant treatment	Chemotherapy		DFS＞1years	0	0	Peak	11months	Peak
1	elevated group	18	Female	37	Adenocarcinoma	19del		IV	4	Lung、Liver、Bone	2019-10-11	353	10	11	1.23	2.49	0.32	2.02439	286.992	First-line treatment	Targeted therapy+Chemo	28months		840	0	Peak	4years	Peak
1	elevated group	19	Female	64	Adenocarcinoma	21L858r		IV	4	Bone、lymph nodes、Pleura	2020-02-26	487	9.4	9.1	0.65	37.07	1.19	57.0308	749.231	progression after third-line or later treatment	Chemotherapy			0	0		129days
1	elevated group	20	Female	75	Adenocarcinoma	19del		IV	4	Pleura、lymph nodes	2020-04-22	489	10.2	11.2	0.86	8.66	1.57	10.0698	568.605	Progression after second-line treatment	Immunotherapy+ Chemo	7months10days		220	0	Peak/Sustained40days	6months	Peak
1	elevated group	21	Female	43	Squamous			IV	4	Pleura	2018-11-20	367	10	10.6	0.7	6.04	0.83	8.62857	524.286	Progression after first-line treatment	Chemotherapy			0	0		1year and a half
1	elevated group	22	Male	69	Adenocarcinoma			IV	4	Lung	2019-11-04	595	10	11.5	4.66	5.78	0.39	1.24034	127.682	Diagnosis	Antiangiogenesis+Chemo	9months20days		290	0	Peak/Sustained120days	1year	Peak
1	elevated group	23	Male	71	Adenocarcinoma			IV	4	Lung	2018-10-09	371	9.8	11.9	2.35	8.96	0.21	3.81277	157.872	Diagnosis	Chemotherapy	10months		300	0	Fluctuation	21months	Fluctuation
1	elevated group	24	Female	57	Adenocarcinoma		PDL1 40%	IV	4	Bone	2020-05-06	382	9.4	9.5	0.46	6.12	0.98	13.3043	830.435	First-line treatment	Antiangiogenesis+Chemo	3months		90	0	Peak/Sustained40days	2months20days	Peak
1	elevated group	25	Female	54	Adenocarcinoma	19del		IV	4	Brain	2020-01-21	340	9.4	9.8	1.19	5.01	0.83	4.21008	285.714	Diagnosis	Chemotherapy	7months7days		217	0	Peak/Sustained40days	8months20days	Peak
1	elevated group	26	Male	68	Adenocarcinoma			IV	4	Adrenal gland	2020-04-28	399	9.8	9.9	2.01	4.95	4.28	2.46269	198.507	Progression after second-line treatment	Immunotherapy+ Chemo			0	0		8months
1	elevated group	27	Male	72	Adenocarcinoma		TPS 90%	IV	4	Brainm	2020-05-07	454	9.3	9.8	2.38	9.26	1	3.89076	190.756	Diagnosis	Targeted therapy	5months		150	0	Sustained	5months15days	Sustained
1	elevated group	28	Male	67	Squamous			IIIA	3		2020-04-27	567	8.8	8.6	1.36	4.44	2.45	3.26471	416.912	Diagnosis		/		0	0		10days
1	elevated group	29	Female	43	Adenocarcinoma			IV	4	Liver	2019-08-19	359	10.5	11.2	2.3	4.75	4.17	2.06522	156.087	Diagnosis	Antiangiogenesis+Chemo	8months16days		256	0	Peak	1year4months	Peak
1	elevated group	30	Female	54	Adenocarcinoma	ALK+		IV	4	Pleura	2018-02-20	422	10.4	11.4	1.32	7	2.7	5.30303	319.697	Diagnosis	Targeted therapy+Chemo	7months		210	0	Peak	3years13days	Peak
1	elevated group	31	Female	70	NSCLC			III	3		2020-05-10	326	8.6	8.4	1.27	8.35	0.27	6.5748	256.693	Diagnosis				0	0
1	elevated group	33	Female	74	Adenocarcinoma			IV	4	Lung、Bone	2019-02-19	331	8.9	9.1	2.16	5.25	0.54	2.43056	153.241	First-line treatment	Antiangiogenesis+Chemo	35months		1050	0	Peak	2years1months	Peak
1	elevated group	34	Male	67	Adenocarcinoma			IV	4	Brain	2020-06-17	304	10.1	10.4	1.1	2.78	0.81	2.52727	276.364	First-line treatment	Antiangiogenesis+Chemo	/		0	0		7months20days
1	elevated group	35	Female	56	Adenocarcinoma	19del		IV	4	Lung、Brain	2020-05-11	310	10.4	12.4	2.75	4.49	0.67	1.63273	112.727	Diagnosis	Antiangiogenesis+Chemo+Targeted	13months8days		398	0	Peak	3years5months	Peak
1	elevated group	36	Male	50	Adenocarcinoma			IIIB	3		2018-12-03	378	9.5	10.2	1.38	8.44	0.42	6.11594	273.913	Diagnosis	Chemotherapy	1month 10days		40	0	Fluctuation	2years8months	Fluctuation
1	elevated group	37	Male	64	Adenocarcinoma			IV	4	Lung	2020-04-04	320	11.3	13.6	0.78	9.98	0.69	12.7949	410.256	Diagnosis	Immunotherapy+ Chemo	11months8days		338	0	Fluctuation	1year	Fluctuation
1	elevated group	38	Male	69	SCLC			IV	4	Lung	2018-08-16	328	10	11.3	1.96	5.68	2.1	2.89796	167.347	First-line treatment	Chemotherapy	9months7days		277	0	Fluctuation	2years8months	Fluctuation
1	elevated group	39	Female	63	Adenocarcinoma	19del		IV	4	Pleura	2020-06-18	308	10	11.7	1.55	2.87	6.51	1.85161	198.71	First-line treatment	Chemotherapy	6months		180	0	Fluctuation	10months13days	Fluctuation
1	elevated group	40	Female	71	SCLC			II	2		2017-05-12	383	10.5	11.9	2.2	14.49	1.06	6.58636	174.091	Diagnosis	Chemotherapy	68months		2040	0	Peak	5years9months	Peak
1	elevated group	41	Male	57	Adenocarcinoma	ALK+		IV	4	Liver、Bone、Brain、Adrenal gland	2020-11-09	318	10.9	14	1.02	7.14	0.26	7	311.765	Third-line or later treatment	Chemotherapy			0	0		3years9months
1	elevated group	42	Female	54	Neuroendocrine			IV	4	Liver、Adrenal gland	2020-05-16	360	10	11.8	1.12	2.22	1.72	1.98214	321.429	Diagnosis	Chemotherapy			0	0
1	elevated group	43	Female	57	Adenocarcinoma			IIIA	3		2020-06-13	335	10	11.4	1.63	6.82	0.49	4.18405	205.521	Diagnosis				0	0
1	elevated group	44	Male	66	Squamous			IV	4	Bone	2021-01-26	411	9	8.3	1.38	7.98	1.25	5.78261	297.826	Progression after first-line treatment	Antiangiogenesis+Chemo+Immuno	2 months 21days		81	0	Peak/Sustained57days	5months9days	Peak
1	elevated group	45	Male	68	Squamous			IIB	2		2020-07-20	362	10.6	12	2.05	6.82	1.79	3.32683	176.585	Post-operative period		/		0	0		3months15days
1	elevated group	46	Female	69	Adenocarcinoma			IV	4	Bone	2020-04-21	407	9.3	9.8	0.57	5.49	2.14	9.63158	714.035	First-line treatment	Chemotherapy	11months		330	0	Peak	7months	Peak
1	elevated group	47	Male	57	Adenocarcinoma			IIIB	3		2018-12-04	357	9	9.9	1.88	2	0.27	1.06383	189.894	First-line treatment	Chemotherapy	3months10days		100	0	Fluctuation	4years11months19days	Fluctuation
1	elevated group	48	Female	52	Sarcomatoid	21L858R		IIIB	3		2020-03-12	381	11.9	15.4	3.16	25.14	2.57	7.9557	120.57	Diagnosis	Targeted therapy+Chemo	5months23days		173	0	Fluctuation	7months7days	Fluctuation
1	elevated group	49	Male	60	Squamous			IV	4	Bone	2020-07-05	303	8.9	8.9	1.48	5.43	2.41	3.66892	204.73	Diagnosis	Immunotherapy+ Chemo	7months26days		236	0	Peak	10months10days	Peak
1	elevated group	50	Female	63	Adenocarcinoma	21L858R		IV	4	Pleura、peritoneum	2018-12-10	347	9.7	9.7	0.61	2.47	6.73	4.04918	568.852	Third-line or later treatment				0	0		5years3months
1	elevated group	51	Male	67	Squamous			III	3		2020-06-22	412	8.9	8.5	0.65	9.59	0.83	14.7538	633.846	Progression after first-line treatment	Antiangiogenesis+Chemo			0	0		18months13days
1	elevated group	52	Male	67	SCLC			III	3		2019-09-25	395	8.6	8.5	2.81	4.32	0.95	1.53737	140.569	Diagnosis	Chemotherapy	5months24days		174	0	Peak	10months10days	Peak
1	elevated group	53	Male	53	Squamous		TPS 40%	IIIB	3		2020-04-02	321	10.2	11.8	2.46	4.09	0.61	1.6626	130.488	Diagnosis	Chemotherapy	11months		330	0	Peak	11months	Peak
1	elevated group	54	Male	62	Squamous			IV	4	Lung、Bone	2019-11-05	332	10	11.8	1.98	2.97	0.68	1.5	167.677	First-line treatment	Antiangiogenesis+Chemo	2months21days		81	0	Sustained	9months	Sustained
1	elevated group	55	Male	81	NSCLC			IV	4	peritoneum	2020-06-30	349	10	10.1	1.47	12.16	2.16	8.27211	237.415	Diagnosis	Chemotherapy			0	0
1	elevated group	56	Male	68	AdenocarcinomaSquamous		TPS 20%	II	2		2020-02-03	335	9.4	10.4	1.83	3.46	2.13	1.89071	183.06	Post-operative period	Chemotherapy		DFS 20months	0	600	Peak	3years10months	Peak
1	elevated group	57	Male	67	Squamous			IIIB	3		2020-05-28	327	10.2	12.1	1.11	5.65	0.26	5.09009	294.595	Diagnosis	Chemotherapy	/		0	0		2months20days
1	elevated group	58	Female	47	Adenocarcinoma			III	3		2013-04-22	347	9.6	10.8	1.72	5.56	2.13	3.23256	201.744	Post-operative period	Chemotherapy		DFS 46months	0	1380	Peak	8years8months	Peak
1	elevated group	59	Female	65	Adenocarcinoma			IV	4	Pleura，Brain	2019-11-04	350	9	10.1	1.49	11.18	9.68	7.50336	234.899	Diagnosis	Antiangiogenesis+Chemo	3 months		90	0	Peak	1year5months	Peak
1	elevated group	60	Female	67	SCLC			IV	4	Bone	2020-08-10	323	8.3	8.6	1.63	5.29	1.54	3.2454	198.16	Third-line or later treatment		5months5days		155	0	Fluctuation	2years7months	Fluctuation
1	elevated group	61	Male	67	SCLC			II	2		2020-02-11	344	9	9.1	1.64	3.07	0.52	1.87195	209.756	Second-line treatment	Chemotherapy			0	0		4months18days
1	elevated group	62	Male	58	SCLC			II	2		2020-06-01	376	9.7	10.8	1.52	3.01	0.8	1.98026	247.368	Diagnosis	Chemotherapy	10months		300	0	Peak	13months17days	Peak
1	elevated group	63	Male	80	Adenocarcinoma	ALK+		III	3		2019-10-18	334	11.6	14	0.48	2.95	2.4	6.14583	695.833	First-line treatment	Targeted therapy	26months		780	0	Fluctuation	2years3months	Fluctuation
1	elevated group	64	Male	63	SCLC			II	2		2019-09-26	440	8.6	8.9	1.86	2.26	0.24	1.21505	236.559	First-line treatment	Chemotherapy	14months		420	0	Peak	3years11months12days	Peak
1	elevated group	65	Male	52	Adenocarcinoma			IV	4	Lung、Bone、Brain	2016-07-25	337	10.9	14	2	2.63	1.19	1.315	168.5	Second-line treatment	Chemotherapy			0	0		6years11months10days
1	elevated group	66	Female	49	Adenocarcinoma	19del		IV	4	Lung	2020-08-06	483	9.6	11.3	1.22	17.37	1.62	14.2377	395.902	Diagnosis	Targeted therapy	36months		1080	0	Peak	3years	Peak
1	elevated group	67	Male	62	Squamous			IIIA	3		2017-10-05	398	10.3	12.5	1.85	5.74	0.71	3.1027	215.135	Diagnosis	Surgery		DFS 31months	0	930	Peak	6years	Peak
1	elevated group	68	Male	73	Adenocarcinoma			IV	4	Lung、Adrenal gland	2020-06-20	366	8.8	8.5	3.44	10.03		2.9157	106.395	Progression after second-line treatment	Antiangiogenesis+Chemo	3months21days		111	0	Peak/Sustained40days	1year11months5days	Peak
1	elevated group	69	Female	77	Adenocarcinoma			IV	4	Liver	2021-07-08	363	10.7	12.4	0.66	13.06		19.7879	550	Progression after second-line treatment	Immunotherapy+ Chemo			0	0		1year
1	elevated group	70	Male	71	Adenocarcinoma			IV	4	Pleura	2020-04-07	372	10.7	12.7	1.76	8.64		4.90909	211.364	Diagnosis	Immunotherapy+ Chemo	3months13days		103	0	Sustained	7months22days	Sustained
1	elevated group	71	Female	55	Adenocarcinoma	19 ins		IV	4	Lung	2019-11-04	366	8.7	9.6	2.21	4.65	0.47	2.10407	165.611	Diagnosis	Targeted therapy+Chemo	10months		300	0	Peak/Sustained35days	4years8days	Peak
1	elevated group	72	Female	65	Adenocarcinoma	21L858R		IV	4	Lung、Bone、Brain	2020-07-23	328	9.3	9.8	1.71	5.29	0.71	3.09357	191.813	Second-line treatment	Targeted +radiotherapy+Antiangiogenesis			0	0		9days
1	elevated group	73	Male	62	Adenocarcinoma			IV	4	Lung	2021-03-05	338	10.8	11.5	4.18	6.77	0.53	1.61962	80.8612	Second-line treatment	Immunotherapy+ Chemo			0	0		10months6days
1	elevated group	74	Male	66	Adenocarcinoma			III	3		2020-07-22	335	8.2	8.3	0.96	5.86	6.44	6.10417	348.958	Diagnosis				0	0
1	elevated group	75	Male	64	Adenocarcinoma			IV	4	Adrenal gland、Bone	2020-04-03	372	10.3	10.4	1.63	4.7	0.82	2.88344	228.221	Diagnosis	chemoradiotherapy	2months10days		70	0	Sustained	5months25days	Sustained
1	elevated group	76	Male	70	SCLC			IV	4	lymph nodes	2020-02-11	312	10.1	11	1.02	4.02	0.97	3.94118	305.882	First-line treatment	Chemotherapy	7months		210	0	Fluctuation	8months18days	Fluctuation
1	elevated group	77	Female	82	SCLC			III	3		2019-08-23	419	9.5	11	2.34	3.35	0.67	1.43162	179.06	First-line treatment	Chemotherapy	5months		150	0	Peak	1year3months	Peak
1	elevated group	78	Male	70	Adenocarcinoma	21 pl833f		IV	4	Liver	2020-07-21	368	9.9	11	2.32	4.86	0.6	2.09483	158.621	Diagnosis	Targeted therapy	4months23days		143	0	Sustained	1year4months15days	Sustained
1	elevated group	79	Male	66	SCLC			III	3		2020-07-21	350	9.5	11	1.23	10.59	1.93	8.60976	284.553	Diagnosis	Chemotherapy	/		0	0		3months6days
1	elevated group	80	Female	64	SCLC			IV	4	Lung	2019-07-12	318	10.6	12	1.22	5.08	0.57	4.16393	260.656	First-line treatment	Chemotherapy	14months		420	0	Peak	1year2months7days	Peak
1	elevated group	81	Female	70	Adenocarcinoma	19del		IV	4	Lung、Brain	2019-05-15	312	11.8	14.6	1.94	4.07	0.35	2.09794	160.825	Diagnosis	Targeted therapy+Chemo	21months10days		640	0	Fluctuation	4years6months	Fluctuation
1	elevated group	82	Male	46	Adenocarcinoma			IV	4	Pleura	2020-05-05	366	9.2	9.6	1.98	2.16	0.66	1.09091	184.848	First-line treatment	Antiangiogenesis+Chemo	8months		240	0	Peak/Sustained40days	1year	Peak
1	elevated group	83	Female	79	Adenocarcinoma	21L858R		IV	4	Pleura	2020-08-25	333	10.7	12.7	1.37	3.31	1.52	2.41606	243.066	First-line treatment	Antiangiogenesis+Chemo+Targeted	2months		60	0	Fluctuation	6months11days	Fluctuation
1	elevated group	84	Male	66	AdenocarcinomaSquamous			Postoperative recurance	Postoperative recurance		2020-05-19	563	9	8.4	5.4	6.02	0.55	1.11481	104.259	Postoperative recurance				0	0
1	elevated group	85	Female	67	Adenocarcinoma	19del		IV	4	Pleura、Bone	2019-03-10	341	9.9	10.7	1.38	6.74		4.88406	247.101	Diagnosis	Targeted therapy+Chemo	31months		930	0	Peak	2years8months14days	Peak
1	elevated group	86	Female	73	Squamous			IV	4	Bone、Pleura	2020-08-03	425	8.7	9.7	0.94	5.4	7.02	5.74468	452.128	Diagnosis	Antiangiogenesis	2months24days		84	0	Fluctuation	3months18days	Fluctuation
1	elevated group	87	Male	73	Adenocarcinoma			IV	4	Pleura	2016-11-15	453	9.4	10.6	1.6	3	1.31	1.875	283.125	Progression after first-line treatment	Chemotherapy			0	0		3years9months
1	elevated group	88	Female	68	Adenocarcinoma			IV	4	Brain，Bone	2020-08-14	335	8.3	8.4	1.31	3.48	4.09	2.65649	255.725	First-line treatment	Immunotherapy+ Chemo	3months		90	0	Peak/Sustained2个months	6months25days	Peak
1	elevated group	89	Female	62	Adenocarcinoma		TPS：15%	IV	4	Lung	2020-08-17	348	9	10.2	1.4	2.9	0.39	2.07143	248.571	Diagnosis	Chemotherapy	/		0	0	Peak	6months26days	Peak
1	elevated group	90	Male	73	Adenocarcinoma	19del		IV	4	Chest wall、Bone	2020-08-28	334	9.3	9.6	0.95	7.13	0.66	7.50526	351.579	progression after third-line or later treatment				0	0		2months5days
1	elevated group	91	Male	68	Adenocarcinoma			III	3		2020-05-27	335	10.4	11.7	1.46	7.76	/	5.31507	229.452	Diagnosis	Antiangiogenesis+Chemo	44months		1320	0	Fluctuation	42months4days	Fluctuation
1	elevated group	92	Female	55	Adenocarcinoma	ALK+		IV	4	Lung	2020-06-12	322	9.9	12	1.49	1.55	0.64	1.04027	216.107	First-line treatment	Targeted therapy+Chemo	26months		780	0	Peak	29months17days	Peak
1	elevated group	93	Male	51	Squamous			IV	4	Pleura	2020-07-28	360	9.4	9.3	0.74	2.75	/	3.71622	486.486	Second-line treatment	Chemotherapy			0	0		8months10days
1	elevated group	94	Female	73	Adenocarcinoma			IIb	2		2018-04-23	438	8.8	9.6	0.69	9.49	/	13.7536	634.783	Post-operative period	Adjuvant chemotherapy		DFS 28months	0	840	Fluctuation	29months16days	Fluctuation
1	elevated group	95	Female	71	Adenocarcinoma	19del		IV	4	Bone	2020-11-16	322	12	14.3	0.51	7.07	2.08	13.8627	631.373	First-line treatment	Targeted therapy	16months		480	0	Peak	20months	Peak
1	elevated group	96	Male	54	Squamous			IIIA	3		2018-03-14	317	10.7	13.1	0.75	3.81	1.99	5.08	422.667	Diagnosis	Surgery		DFS 8months	0	240	Peak	12months8days	Peak
1	elevated group	97	Male	58	Adenocarcinoma	19del		IV	4	Brain	2022-01-30	343	10.4	11.8	0.99	3.91	1.41	3.94949	346.465	progression after third-line or later treatment				0	0
1	elevated group	99	Male	86	Squamous			IV	4	Bone	2020-09-09	353	10.6	12.9	0.8	9.36	0.57	11.7	441.25	Diagnosis				0	0
1	elevated group	100	Female	52	Adenocarcinoma	19del		III	3		2015-11-02	361	9.5	11.1	1.7	2.31	1.18	1.35882	212.353	First-line treatment	Targeted therapy+Chemo	14months		420	0	Fluctuation	8years20days	Fluctuation
1	elevated group	101	Male	76	NSCLC			IV	4	Bone	2020-08-22	390	8.7	8.6	1.41	6.34		4.49645	276.596	Diagnosis				0	0
1	elevated group	102	Female	56	Adenocarcinoma	21L858r		IV	4	Bone	2020-08-03	395	9	9.8	1.06	10.51		9.91509	372.642	Diagnosis	Targeted therapy+Chemo	38months13days		1153	0	Fluctuation	3years2months13days	Fluctuation
1	elevated group	103	Female	77	Adenocarcinoma	19del		IV	4	Pleura	2019-09-14	383	9.4	9.4	1.54	4.48	1.07	2.90909	248.701	Diagnosis	Targeted therapy	12months		360	0	Peak	2years13days	Peak
1	elevated group	104	Male	73	SCLC			IV	4	Liver、Bone	2018-10-19	362	9.7	11.7	1.17	1.85		1.5812	309.402	First-line treatment	Chemotherapy	12months		360	0	Peak/Sustained40days	5years	Peak
1	elevated group	105	Male	71	NSCLC		TPS 70%	IV	4	Bone	2020-08-25	379	10.2	11.9	1	10.03	0.81	10.03	379	Diagnosis	Immunotherapy+ Chemo	3months15days		105	0	Fluctuation	1year8months	Fluctuation
1	elevated group	106	Female	66	Squamous			IIIB	3		2020-10-07	344	9	8.9	0.84	14.91	0.42	17.75	409.524	Diagnosis	Targeted therapy	11months		330	0	Peak	11months8days	Peak
1	elevated group	107	Male	62	Squamous			IIIB	3		2020-09-15	356	9.2	9.1	1.69	3.58		2.11834	210.651	Adjuvant treatment	Immunotherapy	/		0	0		10months
1	elevated group	108	Male	75	Adenocarcinoma			IV	4	Bone	2020-10-09	377	10	11.5	1.27	4.02	0.55	3.16535	296.85	First-line treatment	Chemotherapy	3months20days		110	0	Fluctuation	3months15days	Fluctuation
1	elevated group	109	Male	48	Adenocarcinoma	19del		IIIB	3		2016-04-05	437	10.4	12.2	1.59	9.38		5.89937	274.843	Diagnosis	Targeted therapy	53months		1590	0	Peak	5years7months	Peak
1	elevated group	110	Female	60	Squamous	19del		IV	4	Bone	2020-08-06	348	9.5	11	1.54	5.61	0.41	3.64286	225.974	Diagnosis	Targeted therapy+Chemo	4months		120	0	Fluctuation	1year6months	Fluctuation
1	elevated group	111	Male	52	Squamous			IIb	2		2010-03-18	363	7.1	15.6	1.6	5.1		3.1875	226.875	Diagnosis	Surgery		DFS 46months	0	1380	Peak	10years	Peak
1	elevated group	112	Male	68	SCLC			III	3		2020-09-23	323	9.6	10.6	0.98	5.8	0.9	5.91837	329.592	Diagnosis	Chemotherapy	12months		360	0	Peak	1year8months13days	Peak
1	elevated group	113	Male	62	Adenocarcinoma			IV	4	Pleura	2022-04-20	336	10.6	12.5	2.18	5.69	0.44	2.61009	154.128	Third-line or later treatment	Antiangiogenesis+Chemo	7months		210	0	Fluctuation	1year7months	Fluctuation
1	elevated group	114	Female	50	Adenocarcinoma			IV	4	Pleura	2018-08-29	462	9	10.2	1.52	2.86	1.05	1.88158	303.947	Second-line treatment	Chemotherapy			0	0		2years2months
1	elevated group	115	Female	82	Adenocarcinoma	19del		IV	4	Pleura	2020-10-22	363	11.4	13.9	2.6	8.27	2.73	3.18077	139.615	Diagnosis	Targeted therapy	/		0	0		18days
1	elevated group	116	Male	65	Adenocarcinoma	21L858R		IV	4	Bone	2020-11-30	318	8.8	9.4	2.97	4.27	0.4	1.43771	107.071	First-line treatment	Antiangiogenesis+Targeted therapy	/		0	0		2months22days
1	elevated group	117	Female	87	Adenocarcinoma	19del		IV	4	Pleura、Bone、Adrenal gland	2020-10-27	323	9.5	10.3	1.27	4.09	0.32	3.22047	254.331	Diagnosis	Targeted therapy	7months		210	0	Sustained	8months11days	Sustained
1	elevated group	118	Male	64	Squamous			III	3		2020-03-09	447	9.5	10.2	1.39	5.43	0.57	3.90647	321.583	Diagnosis	Immunotherapy+ Chemo	27months		810	0	Peak/Sustained34days	3years8months	Peak
1	elevated group	119	Male	66	SCLC			IV	4	Pleura	2020-10-29	321	9.5	10	2.05	3.92	2.1	1.9122	156.585	Diagnosis	chemoradiotherapy	6months		180	0	Fluctuation	1year5months	Fluctuation
1	elevated group	120	Female	72	Adenocarcinoma	19del		IV	4	Lung	2019-07-15	311	8.4	8.8	2.67	6.16	0.4	2.30712	116.479	Diagnosis	Targeted therapy	15months		450	0	Peak	1year5months	Peak
1	elevated group	121	Male	67	Adenocarcinoma			I	1		2019-01-14	336	9.2	9.6	3.39	6.99		2.06195	99.115	Diagnosis	Surgery	/		0	0		3years11months
1	elevated group	122	Male	71	SCLC			IV	4	Pleura	2020-11-02	425	9.8	10.4	0.8	5.79		7.2375	531.25	Diagnosis	Chemotherapy	9months14days		284	0	Peak/Sustained60days	1year	Peak
1	elevated group	123	Male	37	Adenocarcinoma			I	1		2020-07-28	325	10.1	12.5	2.34	7.49	0.11	3.20085	138.889	Diagnosis		/		0	0		5months20days
1	elevated group	124	Female	49	Adenocarcinoma			I	1		2020-11-05	305	12.1	15.4	1.77	3	0.09	1.69492	172.316	Diagnosis		/		0	0		12days
1	elevated group	125	Female	49	SCLC			II	2		2020-11-06	416	8.7	9.6	1.16	3.84	0.19	3.31034	358.621	Second-line treatment	Immunotherapy+ Chemo			0	0		11months16days
1	elevated group	127	Male	68	Squamous			IIIA	3		2022-01-18	391	8.8	8.9	2.73	6.49	1.18	2.37729	143.223	Second-line treatment	Immunotherapy+ Chemo	9months25days		295	0	Peak	1year10months	Peak
1	elevated group	128	Male	67	Squamous			IIIB	3		2019-07-01	368	9.2	9.7	1.74	4.7	1.72	2.70115	211.494	Progression after first-line treatment	Chemotherapy	16months		480	0	Peak	2years2months	Peak
1	elevated group	129	Male	80	SCLC			IV	4	peritoneum	2020-11-11	345	10.3	12.3	1.82	4.63	1.37	2.54396	189.56	Diagnosis				0	0
1	elevated group	130	Male	74	Adenocarcinoma	19del		IV	4	BoneM	2020-09-13	442	9.1	9.6	2.24	7.27	1.36	3.24554	197.321	First-line treatment	Targeted therapy+Chemo	8months		240	0	Fluctuation	2years13days	Fluctuation
1	elevated group	131	Male	66	Adenocarcinoma			IV	4	Pleura	2020-12-11	315	10.2	11.2	2.1	4.7		2.2381	150	First-line treatment	Antiangiogenesis+Chemo	7months		210	0	Fluctuation	11months10days	Fluctuation
1	elevated group	132	Male	48	Squamous			IV	4	Bone	2020-08-26	341	9.8	10.3	1.54	4.81	1.1	3.12338	221.429	Diagnosis	Antiangiogenesis+Chemo	12months		360	0	Peak	3years	Peak
1	elevated group	133	Male	65	NSCLC			IV	4	Bone、Lung、Adrenal gland、Pleura	2020-11-17	313	11	12.7	1.65	8.66	2.16	5.24848	189.697	Diagnosis	Chemotherapy	/		0	0
1	elevated group	134	Female	34	Adenocarcinoma			I	1		2020-12-08	347	9.4	10.3	2.17	4.22	3.77	1.9447	159.908	Adjuvant treatment	Chemotherapy	/		0	0		40days
1	elevated group	135	Female	44	Adenocarcinoma	19del		IV	4	Brain、Lung	2020-11-16	427	9.8	10.5	0.93	6.83	40	7.34409	459.14	Diagnosis	Targeted therapy	1month 11days		41	0	Sustained	75days	Sustained
1	elevated group	136	Male	70	Adenocarcinoma	21L858R		IB	1		2019-12-21	345	9.5	10.9	1.92	3.32	1.08	1.72917	179.688	Adjuvant treatment	Chemotherapy		DFS 3months3days	0	93	Peak	3years10months	Peak
1	elevated group	137	Male	68	SCLC			III	3		2021-11-10	333	9.3	9.4	0.37	2.73	0.77	7.37838	900	Second-line treatment	Antiangiogenesis+chemoradiotherapy			0	0	Peak	1year3months	Peak
1	elevated group	138	Female	63	Adenocarcinoma	21L858R		IV	4	Bone	2020-09-14	379	10.3	11.3	1.89	3.73	1.37	1.97354	200.529	Diagnosis	Antiangiogenesis+Targeted therapy+radiotherapy	12months11days		371	0	Peak/Sustained48days	1year2months20days	Peak
1	elevated group	139	Male	74	NSCLC			IV	4	Pleura	2020-10-10	430	10.2	11.2	0.94	7.54	0.41	8.02128	457.447	Diagnosis	Chemotherapy	1month 26days		56	0	Sustained	3months26days	Sustained
1	elevated group	140	Female	59	Adenocarcinoma	T790M		IV	4	Lung、Bone、Adrenal gland	2022-07-13	341	9.7	10.2	1.7	7.22	3.62	4.24706	200.588	progression after third-line or later treatment	Chemotherapy			0	0		3years6months
1	elevated group	141	Male	72	Adenocarcinoma			IV	4	Lung	2023-07-27	407	9.7	10.1	0.89	7.82	2.59	8.78652	457.303	Postoperative recurance	Chemotherapy			0	0		6years
1	elevated group	142	Female	80	Adenocarcinoma			IIIA	3		2020-12-01	439	11	13.2	1.2	4.28	1.03	3.56667	365.833	Diagnosis		/		0	0
1	elevated group	143	Male	74	SCLC			IV	4	Liver	2020-09-15	313	10.3	11.7	1.09	1.17	2.17	1.07339	287.156	First-line treatment	Immunotherapy+ Chemo	3months23days/die		113	0	Sustained	4months16days	Sustained
1	elevated group	144	Male	58	Adenocarcinoma			IV	4	Pleura	2016-11-15	328	10	11.5	1.68	1.97	1.1	1.17262	195.238	Third-line or later treatment	Chemotherapy			0	0		7years9months
1	elevated group	145	Male	66	NSCLC			III	3		2020-12-09	310	8.9	8.8	1.49	3.09	2.27	2.07383	208.054	First-line treatment	chemoradiotherapy+immuno	3months10days		100	0	Fluctuation	3months10days	Fluctuation
1	elevated group	146	Male	91	Squamous			IV	4	Liver	2020-12-04	318	10.6	13.7	1.42	10.81	2.59	7.61268	223.944	Diagnosis				0	0
1	elevated group	147	Female	59	Adenocarcinoma	ALK +		IV	4	Liver、Pleura、Brain	2020-03-06	428	9.9	10.5	1.27	11.58	1.36	9.11811	337.008	Diagnosis	Targeted therapy	8months14days		254	0	Sustained	10months2days	Sustained
1	elevated group	148	Male	71	Squamous			IV	4	Liver	2022-11-01	390	8.9	9.6	1.18	9.26	0.7	7.84746	330.508	Progression after second-line treatment				0	0		2years
1	elevated group	149	Female	61	Adenocarcinoma	21L858R		IV	4	Bone	2020-12-15	320	10.7	13.2	0.93	8.38		9.01075	344.086	Diagnosis	Targeted therapy	32months		960	0	Peak	2years7months	Peak
1	elevated group	150	Female	55	Adenocarcinoma	19del		IV	4	Pleura	2020-12-20	351	9.1	9.5	1.51	6.76		4.47682	232.45	Third-line or later treatment	Targeted therapy		DFS 14months25days	0	445	Peak/Sustained31days	1year10months	Peak
1	elevated group	151	Female	69	Adenocarcinoma	20del		IV	4	Pleura、Brain	2021-03-01	333	9	9.8	0.99	7.95	1.91	8.0303	336.364	Progression after first-line treatment	Targeted therapy	17months		510	0	Peak	3years5months	Peak
1	elevated group	152	Female	70	Adenocarcinoma			I	1		2020-11-04	330	10.7	13.9	1.33	4.38		3.29323	248.12	Post-operative period	Adjuvant chemotherapy	/		0	0		5months
1	elevated group	153	Male	71	Adenocarcinoma		PDL1 positive	III	3		2020-06-28	376	11	13.2	2.11	6.4	4.29	3.03318	178.199	Diagnosis			DFS 44months	0	1320	Peak/Sustained36days	3years4months	Peak
1	elevated group	154	Female	49	NSCLC	ROS1+		IV	4	Bone	2020-12-16	329	10	10.8	1.47	9.46	0.8	6.43537	223.81	Diagnosis	Targeted therapy	9months22days		292	0	Fluctuation/Sustained	1year10months	Fluctuation
1	elevated group	155	Male	77	Adenocarcinoma		TPS 40%	IV	4	Lung	2021-04-23	331	9.4	9.7	1.03	3.92	0.58	3.80583	321.359	First-line treatment	Immunotherapy+ Chemo	7months15days		225	0	Peak	9months11days	Peak
1	elevated group	156	Male	72	SCLC			IV	4	Liver、lymph nodes、renal	2019-05-16	326	10	12	0.7	5.97	2.81	8.52857	465.714	Diagnosis	Immunotherapy+ Chemo	18months		540	0	Peak	2years	Peak
1	elevated group	157	Male	56	Adenocarcinoma			IV	4	Pleura、Bone	2020-12-24	493	9.2	9.8	0.71	12.98	2.73	18.2817	694.366	First-line treatment	chemoradiotherapy+immuno	3months7days		97	0	Fluctuation	4months	Fluctuation
1	elevated group	158	Male	55	Adenocarcinoma	19DEL		IV	4	Bone、Lung、Brain	2021-01-20	329	8.8	8.7	1.47	9.33	3.24	6.34694	223.81	Second-line treatment	Chemotherapy			0	0		2years4months
1	elevated group	159	Male	80	Adenocarcinoma			IV	4	Pleura	2020-12-28	363	10.5	12	0.88	14.89	0.22	16.9205	412.5	Diagnosis	Targeted therapy	13months 25days		415	0	Sustained	1year4months	Sustained
1	elevated group	160	Female	64	AdenocarcinomaSquamous	19del		III	3		2015-04-29	321	10.9	14	1.37	3.2	0.98	2.33577	234.307	Adjuvant treatment		/		0	0		6years6months
1	elevated group	161	Male	83	Squamous			IV	4	Pleura	2021-01-05	444	10.1	10.4	0.73	6.05	3.51	8.28767	608.219	Diagnosis		/		0	0
1	elevated group	162	Male	68	Squamous			IV	4	Liver、pancreas	2021-01-11	310	9.5	9.5	1.12	5.7		5.08929	276.786	Diagnosis				0	0
1	elevated group	163	Male	58	SCLC			IV	4	Lung、Bone	2020-12-11	315	10.3	11.3	2.3	6.22	0.1	2.70435	136.957	Diagnosis	Immunotherapy+ Chemo	10months12days		312	0	Fluctuation	1year8months	Fluctuation
1	elevated group	164	Female	72	Adenocarcinoma	ROS1+		IV	4	Pleura	2021-01-05	306	9.2	9.3	1.11	4.9	1.66	4.41441	275.676	Diagnosis				0	0
1	elevated group	165	Female	68	Adenocarcinoma			I	1		2021-03-19	310	10.5	12.7	1.67	3.36	1.55	2.01198	185.629	Adjuvant treatment	Adjuvant chemotherapy		DFS＞2years11months	0	0	Peak	2years11months	Peak
1	elevated group	166	Male	61	Adenocarcinoma	ALK+		IV	4	Lung	2014-04-25	452	9	10	2.6	3.05	0.97	1.17308	173.846	Diagnosis		/		0	0
1	elevated group	167	Male	74	Squamous			IIIA	3		2021-02-07	393	9.1	8.8	2.04	7.92		3.88235	192.647	Adjuvant treatment	Adjuvant chemotherapy		DFS＞2years 3months	0	0	Fluctuation	2years3months	Fluctuation
1	elevated group	168	Male	65	SCLC			III	3		2020-03-02	336	8.9	9.6	1.54	4.32	4.61	2.80519	218.182	Diagnosis	Chemotherapy	10months		300	0	Fluctuation	1year	Fluctuation
1	elevated group	169	Female	75	Adenocarcinoma			IV	4	Brain	2022-05-11	457	11.2	13.7	1.43	14.66	1.24	10.2517	319.58	progression after third-line or later treatment				0	0		5years
1	elevated group	170	Male	66	Adenocarcinoma	19del		IV	4	pericardium、Pleura	2021-02-16	429	9	9.2	2.3	3.29	3.67	1.43043	186.522	First-line treatment	Targeted therapy	11months		330	0	Peak	1year3months	Peak
1	elevated group	171	Male	53	AdenocarcinomaSquamous			IV	4	Brain	2013-01-19	513	8.2	8.4	1.08	5.78	4.7	5.35185	475	Diagnosis	Chemotherapy	2months20days		80	0	Sustained	8years	Sustained
1	elevated group	172	Female	79	Adenocarcinoma			IV	4	Lung	2021-03-23	442	8.8	9.6	1.35	1.81	4.06	1.34074	327.407	First-line treatment	Chemotherapy	6months		180	0	Fluctuation	5years	Fluctuation
1	elevated group	173	Female	54	NSCLC			IV	4	Pleura	2021-01-07	354	7.7	7.7	1.29	4.76	1.83	3.68992	274.419	Diagnosis				0	0
1	elevated group	174	Female	55	Adenocarcinoma	EGFR ex20ins		III	3		2021-01-24	340	9.7	11	2.13	6.35		2.98122	159.624	Adjuvant treatment	Chemotherapy		DFS 8.5months	#VALUE!	0	Fluctuation	1year6 months	Fluctuation
1	elevated group	175	Male	56	Adenocarcinoma			IV	4	Brain	2021-01-20	518	8.6	8.6	0.56	6.71	0.48	11.9821	925	Diagnosis		/		0	0
1	elevated group	176	Male	66	Squamous			IIIB	3		2020-12-23	368	9	9.3	1.52	5.71	0.84	3.75658	242.105	Diagnosis	Chemotherapy	35months		1050	0	Peak/Sustained36days	2years10months	Peak
1	elevated group	177	Male	78	Squamous			IV	4	Lung	2021-01-31	323	9.8	11.4	0.55	9.89	0.78	17.9818	587.273	Diagnosis		/		0	0
1	elevated group	178	Male	62	Squamous			IIIB	3		2019-07-26	332	8.8	8.5	1.42	7.28		5.12676	233.803	Progression after first-line treatment	Chemotherapy			0	0		1year7months
1	elevated group	179	Male	62	Squamous			IV	4	Lung	2021-02-07	357	10.6	13	0.88	4.35	0.76	4.94318	405.682	Progression after first-line treatment	chemoradiotherapy+immuno			0	0		1year10months
1	elevated group	180	Female	28	Adenocarcinoma			IV	4	Lung、ovary、Liver、Bone	2021-02-11	320	9.7	10.2	3.41	22.78	7.89	6.68035	93.8416	Diagnosis		/		0	0
1	elevated group	181	Male	67	Adenocarcinoma	21L858R		IV	4	Bone、Pleura	2021-02-18	344	11.3	14.2	1.32	3.45	1.42	2.61364	260.606	Diagnosis	Targeted therapy	/		0	0		2months
1	elevated group	182	Male	78	Adenocarcinoma		TMB HIGH，TPS 85%	III	3		2020-12-22	366	8.5	8.4	1.25	3.16	0.61	2.528	292.8	Diagnosis	Antiangiogenesis+immuno	27months		810	0	Fluctuation	2years3months	Fluctuation
1	elevated group	183	Female	68	Adenocarcinoma	20del		IV	4	Pleura	2021-02-20	368	10.8	13	1.8	6.37	1.63	3.53889	204.444	Diagnosis	Targeted therapy	4months		120	0	Peak	6months	Peak
1	elevated group	184	Male	65	Squamous			III	3		2021-02-23	411	8.9	9.1	1.64	6.68	0.25	4.07317	250.61	Diagnosis		/		0	0
1	elevated group	185	Male	61	Adenocarcinoma			IV	4	Bone	2021-02-22	313	10.4	12.9	2.07	7.5	0.22	3.62319	151.208	Diagnosis		/		0	0
1	elevated group	186	Female	50	Adenocarcinoma	ALK+		IIIB	3		2020-12-01	330	10.8	13.2	1.46	3.47	0.48	2.37671	226.027	Adjuvant treatment	Adjuvant chemotherapy		DFS 18months	0	540	Peak	3years	Peak
1	elevated group	187	Female	50	Adenocarcinoma	19del		IV	4	Lung	2018-06-28	363	9.5	11.1	1.56	3.13		2.00641	232.692	Third-line or later treatment	Targeted therapy	21 months		630	0	Fluctuation	8years	Fluctuation
1	elevated group	188	Male	68	AdenocarcinomaSquamous		TPS 60%	IIIA	3		2020-03-09	335	10.2	11.9	2.17	6.13	1.09	2.82488	154.378	Diagnosis	Surgery		DFS 5months23days	0	173	Peak	1year3months	Peak
1	elevated group	189	Male	75	Adenocarcinoma		TPS 80%	IV	4	Pleura、Liver、Bone	2020-12-08	365	10	10.6	1.82	8.78	2.45	4.82418	200.549	Diagnosis	Immunotherapy	16months		480	0	Fluctuation	2years2months	Fluctuation
1	elevated group	190	Female	76	Adenocarcinoma			IV	4	peritoneum	2014-10-21	409	9.5	10.7	1.32	2.51	1.98	1.90152	309.848	progression after third-line or later treatment				0	0
1	elevated group	191	Male	55	Squamous	RET 31.2%	TPS 90%，	III	3		2021-03-09	518	10	10.8	2.3	9.88	0.17	4.29565	225.217	Diagnosis	Immunotherapy	16days		16	0	Fluctuation/Sustained65days	2years7months	Fluctuation
1	elevated group	192	Male	76	Squamous			IV	4	Lung	2021-04-07	317	8.9	9.8	1.82	16.47		9.04945	174.176	First-line treatment	Immunotherapy+ Chemo	10months18days		318	0	Fluctuation	1year8months	Fluctuation
1	elevated group	193	Female	47	Squamous	ALK+		IV	4	Liver	2019-01-10	351	10.8	12.3	1.1	4.41		4.00909	319.091	First-line treatment	Targeted therapy	13months		390	0	Fluctuation	3years	Fluctuation
1	elevated group	194	Male	70	Adenocarcinoma			IV	4	Pleura	2022-06-27	309	11.1	12.3	1.21	4.37	4.08	3.61157	255.372	First-line treatment	Immunotherapy+ Chemo	/		0	0		1year4months
1	elevated group	196	Male	66	SCLC			III	3		2021-03-18	342	10.6	13	1.44	4.78	1.18	3.31944	237.5	Diagnosis				0	0
1	elevated group	197	Male	70	Adenocarcinoma			IV	4	Lung，Bone	2020-12-10	327	10.8	12.4	1.35	10.55	0.86	7.81481	242.222	Diagnosis	Chemotherapy	18months		540	0	Fluctuation		Fluctuation
1	elevated group	198	Female	67	Adenocarcinoma	ROS1+		IV	4	Pleura	2022-08-01	438	10.3	10.9	1.15	2.58	0.74	2.24348	380.87	Progression after first-line treatment	Targeted therapy			0	0		2years2months
1	elevated group	199	Male	75	NSCLC			III	3		2021-03-23	384	9.7	10.3	1.7	5.18	0.24	3.04706	225.882	Diagnosis				0	0
1	elevated group	201	Female	48	Adenocarcinoma			IIA	2		2018-10-15	313	9.2	10.3	1.98	3.1	0.8	1.56566	158.081	Adjuvant treatment		/		0	0
1	elevated group	202	Male	63	NSCLC			III	3		2021-01-20	331	10	11.4	1.26	3.01	1.23	2.38889	262.698	First-line treatment	Chemotherapy	10months		300	0	Peak	8months	Peak
1	elevated group	203	Male	76	Adenocarcinoma		PDL1 high	IV	4	Pleura	2021-03-26	316	9.8	10.4	1.1	5.39	4.1	4.9	287.273	Progression after first-line treatment	Antiangiogenesis+immuno			0	0		2years7months
1	elevated group	204	Male	77	Squamous			IV	4	pericardium	2021-03-26	312	10.1	10.9	0.92	5.11		5.55435	339.13	Progression after second-line treatment	Antiangiogenesis			0	0		11months
1	elevated group	205	Male	75	SCLC			IV	4	Pleura、pericardium	2021-04-09	357	9	10	1.12	6.73		6.00893	318.75	Diagnosis	Chemotherapy	/		0	0
1	elevated group	206	Male	70	NSCLC			IIIB	3		2021-04-22	356	10.2	11.6	1.8	4.59	0.27	2.55	197.778	First-line treatment	Chemotherapy	10months		300	0	Peak	2years8months	Peak
1	elevated group	207	Male	72	AdenocarcinomaSquamous		TPS 90%	IV	4	Bone	2021-04-06	303	9.4	10.5	1.17	5.03	0.93	4.29915	258.974	Progression after second-line treatment				0	0	Sustained	1year4months	Sustained
1	elevated group	208	Female	66	Adenocarcinoma			IV	4	Lung	2021-03-30	371	9	8.9	1.16	4.67	1.17	4.02586	319.828	Diagnosis		/		0	0
1	elevated group	209	Male	47	Adenocarcinoma	19del		IV	4	Pleura	2023-08-21	344	9.4	8.9	0.98	7.19	5.49	7.33673	351.02	Third-line or later treatment				0	0		2years6months
1	elevated group	210	Male	64	Squamous			II	2		2021-07-05	432	10.3	11	1.65	4.4	6.28	2.66667	261.818	Adjuvant treatment		/		0	0		1year8months
1	elevated group	211	Male	72	Squamous			III	3		2021-04-09	305	10.2	11	0.56	5.94	1.34	10.6071	544.643	Diagnosis	Chemotherapy	10months		300	0	Peak	1year4months	Peak
1	elevated group	212	Male	75	SCLC			IV	4	Bone	2021-03-22	378	9.8	10.4	1.24	1.83	0.62	1.47581	304.839	First-line treatment	Immunotherapy+ Chemo	10months24days		324	0	Peak	8months24days	Peak
1	elevated group	213	Male	57	SCLC			III	3		2019-11-05	343	11.1	13.5	2.04	4.04	0.92	1.98039	168.137	First-line treatment	chemoradiotherapy	7months		210	0	Fluctuation	3years6months	Fluctuation
1	elevated group	214	Male	65	Adenocarcinoma			Ib	1		2021-05-07	325	9.6	10	1.7	5.17	2.71	3.04118	191.176	Adjuvant treatment	Adjuvant chemotherapy		DFS＞2years6months	0	0	Peak	2years6months	Peak
1	elevated group	215	Female	72	Adenocarcinoma	19del		IV	4	Lung	2021-12-03	348	9.4	10.3	1.51	2.81	0.77	1.86093	230.464	Second-line treatment	Targeted therapy+Chemo			0	0		2years7个months
1	elevated group	216	Male	51	Sarcomatoid			IIIB	3		2021-04-16	583	10	10.9	1.8	21.59	0.16	11.9944	323.889	Diagnosis	Immunotherapy+ Chemo	1month 14days		44	0	Sustained	5months	Sustained
1	elevated group	217	Female	74	Adenocarcinoma	21L858r		IV	4	Bone	2021-04-18	300	9.3	9.7	1.64	4.57	3.14	2.78659	182.927	Diagnosis	Antiangiogenesis+Targeted therapy	32months		960	0	Fluctuation	2years7months	Fluctuation
1	elevated group	218	Female	63	Adenocarcinoma	21L858r		III	3		2021-04-20	359	10.8	12.6	1.79	5.25	0.13	2.93296	200.559	Diagnosis	Targeted therapy	3months 5days		95	0	Sustained	4months	Sustained
1	elevated group	219	Male	65	Squamous			IV	4	Lung	2018-08-27	444	9.2	8.9	1.28	7.82	1.48	6.10938	346.875	Progression after first-line treatment	Antiangiogenesis+chemoradiotherapy			0	0		2years8months
1	elevated group	220	Male	75	Adenocarcinoma			IV	4	Lung、Bone	2021-04-23	417	9	8.6	1.46	7.92	0.85	5.42466	285.616	Diagnosis		/		0	0
1	elevated group	222	Male	66	NSCLC			III	3		2021-04-26	334	9.8	10.7	2.4	5.79	0.68	2.4125	139.167	Diagnosis	Chemotherapy	/		0	0
1	elevated group	223	Male	66	Adenocarcinoma			IV	4	Bone	2021-06-29	338	9.2	9.1	1.44	3.68	1.49	2.55556	234.722	First-line treatment	Antiangiogenesis+Chemo	1month 16days		46	0	Fluctuation	4months7days	Fluctuation
1	elevated group	224	Male	72	Adenocarcinoma			III	3		2021-05-06	356	10.4	11.4	1.93	7.37	2.22	3.81865	184.456	Diagnosis		/		0	0
1	elevated group	225	Male	67	Squamous			II	2		2021-09-07	319	8.7	9.7	2.05	4.25	0.36	2.07317	155.61	Adjuvant treatment	Chemotherapy	/		0	0
1	elevated group	226	Female	78	Adenocarcinoma	19del		III	3		2021-01-03	340	9.4	9.8	0.91	3.26		3.58242	373.626	Diagnosis	Targeted therapy+Chemo	34months		1020	0	Fluctuation	2years8months	Fluctuation
1	elevated group	227	Male	55	Adenocarcinoma			IV	4	Lung	2020-05-12	450	8.8	8.7	3.03	2.26	0.59	0.745875	148.515	First-line treatment	Antiangiogenesis+Chemo	7months7days		217	0	Sustained	3years	Sustained
1	elevated group	228	Male	63	Squamous			III	3		2021-03-31	316	9.6	9.6	2.05	4.83	0.22	2.3561	154.146	Diagnosis	Antiangiogenesis+Chemo+Immuno	30 monthss		900	0	Fluctuation	2years8months	Fluctuation
1	elevated group	229	Male	62	Adenocarcinoma			III	3		2021-05-12	343	9.8	11.8	1.91	5.25	0.5	2.74869	179.581	Diagnosis				0	0		4months
1	elevated group	230	Female	64	Adenocarcinoma			III	3		2021-05-15	342	10.7	12.8	3.49	3.31	0.17	0.948424	97.9943	Diagnosis		/		0	0
1	elevated group	231	Female	44	Adenocarcinoma	19del		III	3		2021-05-20	491	8.8	10.1	1.69	2.77	0.24	1.63905	290.533	Diagnosis	Chemotherapy	2months19days		79	0	Sustained	2years	Sustained
1	elevated group	232	Male	69	Adenocarcinoma			II	2		2021-03-26	581	8.8	9.4	3.51	1.96	0.72	0.558405	165.527	First-line treatment	Antiangiogenesis+Chemo	9months14days		284	0	Fluctuation	1year4months	Fluctuation
1	elevated group	233	Male	69	Adenocarcinoma			I	1		2021-06-21	325	9.6	10.1	1.51	3.2		2.11921	215.232	Post-operative period		/		0	0
1	elevated group	234	Female	51	Adenocarcinoma			I	1		2021-08-04	406	10	11.4	2.77	2.14	0.27	0.772563	146.57	Adjuvant treatment				0	0
1	elevated group	235	Male	72	Squamous			IV	4	Bone、Pleura	2021-05-18	314	9	10.3	2.48	3.64	0.53	1.46774	126.613	Diagnosis	Immunotherapy+ Chemo	/		0	0		2months
1	elevated group	236	Male	67	Squamous			II	2		2019-01-16	449	9.1	9.1	1.45	1.83	3.87	1.26207	309.655	Adjuvant treatment	Adjuvant chemotherapy		DFS 36months18days	0	1098	Fluctuation	3years1months	Fluctuation
1	elevated group	237	Male	63	Adenocarcinoma		PDL1 HIGH	IV	4	Adrenal gland	2021-05-19	366	9.7	10.3	1.26	6.02	4.86	4.77778	290.476	Diagnosis	Immunotherapy+ Chemo	14months15days		435	0	Fluctuation	1year6months	Fluctuation
1	elevated group	238	Male	74	SCLC			III	3		2021-05-24	511	9.6	10.4	1.26	5.87	0.89	4.65873	405.556	Diagnosis		/		0	0
1	elevated group	239	Female	48	Adenocarcinoma	ALK+		IV	4	Pleura	2021-05-21	400	11.3	15.6	1.77	10.05	3.59	5.67797	225.989	Diagnosis	Chemotherapy	6months		180	0	Fluctuation	7months	Fluctuation
1	elevated group	240	Female	69	Adenocarcinoma			IV	4	Bone、pericardium	2021-05-25	395	10	11.2	1.26	13.76		10.9206	313.492	Diagnosis		/		0	0
1	elevated group	241	Female	50	Adenocarcinoma			IV	4	uterus、Bone	2021-05-25	304	9	10.1	1.32	6.07	0.33	4.59848	230.303	Diagnosis		/		0	0
1	elevated group	242	Male	71	SCLC			III	3		2021-03-18	331	9	9.5	1.11	6.4	0.22	5.76577	298.198	Diagnosis	chemoradiotherapy	8months14days		254	0	Fluctuation	1year	Fluctuation
1	elevated group	243	Male	65	Adenocarcinoma			IV	4	Liver、Splenic、Bone	2021-05-07	398	10.3	12.3	2.32	6.53	1.44	2.81466	171.552	Diagnosis		/		0	0
1	elevated group	245	Female	47	Adenocarcinoma	21L858r		IV	4	Lung	2021-08-23	318	10.2	12.8	2.74	5.84	1.01	2.13139	116.058	First-line treatment	Antiangiogenesis+Targeted therapy	27months		810	0	Fluctuation	5years	Fluctuation
1	elevated group	246	Female	52	Adenocarcinoma	19del		IV	4	Bone	2022-01-10	320	9.5	9	0.89	4.4		4.94382	359.551	Third-line or later treatment				0	0		1year7months
1	elevated group	247	Male	65	Squamous			IV	4	Lung	2022-11-14	329	9.5	9.9	1.88	5.41	0.48	2.87766	175	Second-line treatment				0	0		13months
1	elevated group	248	Male	65	Adenocarcinoma			III	3		2019-12-12	309	10.4	11.6	3.04	4.17		1.37171	101.645	Adjuvant treatment	Adjuvant chemotherapy		DFS 11months23days	0	353	Peak	3years	Peak
1	elevated group	249	Male	51	Adenocarcinoma	RET+		IV	4	Pleura、pericardium	2021-09-23	421	9.6	9.7	1.26	5.86	3.75	4.65079	334.127	Progression after first-line treatment				0	0
1	elevated group	250	Male	62	SCLC			III	3		2021-04-26	475	8.6	9.3	1.01	11.37	0.35	11.2574	470.297	First-line treatment	Chemotherapy	2months7days		67	0	Sustained	2months7days	Sustained
1	elevated group	251	Male	28	Adenocarcinoma	19del		IV	4	Pleura、Lung	2020-11-27	306	9.3	9.7	3.18	4.69	1.03	1.47484	96.2264	First-line treatment	Targeted therapy	11months22days		352	0	Fluctuation	12months	Fluctuation
1	elevated group	252	Female	56	Adenocarcinoma	21L858r		IV	4	Bone、Brain	2020-07-17	320	9.6	10.9	2.01	4.47	0.29	2.22388	159.204	Diagnosis	Targeted therapy+Chemo	38months		1140	0	Fluctuation	3years5months	Fluctuation
1	elevated group	253	Female	65	Adenocarcinoma			IV	4	Brain	2022-11-10	325	10.3	10.9	0.86	2.84		3.30233	377.907	First-line treatment		/		0	0
1	elevated group	254	Male	66	Sarcomatoid			IV	4	Bone、Pleura、Lung	2021-06-05	508	9.7	10.1	2.29	5.23	19	2.28384	221.834	Diagnosis	Chemotherapy	/		0	0
1	elevated group	255	Male	71	Adenocarcinoma		TPS 10%	IV	4	Pleura	2021-03-16	307	10.7	12	2.32	6.25		2.69397	132.328	Diagnosis	Immunotherapy+ Chemo	6months15days		195	0	Fluctuation	1year6months	Fluctuation
1	elevated group	256	Male	70	Adenocarcinoma			Postoperative recurance	Postoperative recurance	lymph nodes	2023-03-23	346	9.5	9.8	1.29	2.81		2.17829	268.217	First-line treatment	chemoradiotherapy+immuno	14months		420	0	Peak/Sustained52days	17months	Peak
1	elevated group	257	Male	48	Adenocarcinoma			IV	4	Adrenal gland、Brain、Bone	2021-07-02	337	9.4	10.6	1.7	4.76	0.85	2.8	198.235	Diagnosis		/		0	0
1	elevated group	258	Male	64	Adenocarcinoma			II	2		2021-06-21	381	10	11.1	3.19	9.25	2.12	2.89969	119.436	Adjuvant treatment	Adjuvant chemotherapy		DFS＞2years	0	0	Peak/Sustained45days	2years2months	Peak
1	elevated group	259	Male	68	NSCLC			III	3		2021-06-22	354	10.7	12.5	1.91	8.18	0.3	4.28272	185.34	Diagnosis		/		0	0
1	elevated group	260	Female	67	Adenocarcinoma	19del		IV	4	Brain	2020-07-16	308	9.2	10	1.84	2.03		1.10326	167.391	First-line treatment	Surgery+Targeted+chemo+Antiangiogenesis	30months		900	0	Fluctuation	3years5months	Fluctuation
1	elevated group	261	Male	76	NSCLC			II	2		2021-06-24	492	9.6	10.2	2.68	5.19	0.87	1.93657	183.582	Diagnosis	Immunotherapy+ Chemo	27months		810	0	Fluctuation	2years3months	Fluctuation
1	elevated group	262	Male	71	SCLC			IV	4	Brain	2021-09-14	413	9.4	9.2	1.07	7.46	1.5	6.97196	385.981	Second-line treatment				0	0		1year
1	elevated group	263	Male	74	Squamous			III	3		2021-07-02	381	9.3	9.9	1.86	7.14	1.16	3.83871	204.839	Diagnosis	Immunotherapy+ Chemo	4months9days		129	0	Fluctuation	9months	Fluctuation
1	elevated group	264	Female	65	Adenocarcinoma	ALK+		IV	4	Lung	2018-03-02	400	9.6	10.9	2.34	5	0.52	2.13675	170.94	Diagnosis	Targeted therapy	13months		390	0	Fluctuation/Sustained74days	3years4months	Fluctuation
1	elevated group	265	Male	70	Squamous			III	3		2020-09-30	312	8.4	9.1	1.77	3.73	1.21	2.10734	176.271	Diagnosis	Immunotherapy+ Chemo	6months		180	0	Fluctuation	3years2months	Fluctuation
1	elevated group	266	Male	74	Squamous			III	3		2020-10-30	318	8.3	8.6	1.4	7.18	0.37	5.12857	227.143	Diagnosis	Immunotherapy+ Chemo	6months		180	0	Fluctuation	1year10months	Fluctuation
1	elevated group	267	Male	69	Squamous			III	3		2021-08-05	346	10.5	11.7	1.44	6.53		4.53472	240.278	First-line treatment	chemoradiotherapy+immuno	13months		390	0	Fluctuation	2years3months	Fluctuation
1	elevated group	268	Male	53	Adenocarcinoma			IV	4	Lung	2021-07-16	332	10.2	11.5	1.82	10.48	0.19	5.75824	182.418	Diagnosis	Antiangiogenesis+Chemo	/		0	0		8months
1	elevated group	269	Male	78	AdenocarcinomaSquamous			IV	4	Chest wall	2022-01-10	308	8.6	8.3	1.36	6.36	0.3	4.67647	226.471	Third-line or later treatment		/		0	0
1	elevated group	270	Male	71	Adenocarcinoma	21L858r		IV	4	Pleura	2019-06-26	352	10	10.8	1.19	4.1	1.45	3.44538	295.798	Diagnosis	Targeted therapy+Chemo	24months		720	0	Peak	2years	Peak
1	elevated group	271	Male	59	Adenocarcinoma	ALK+		IV	4	Brain	2018-03-31	309	10.7	12.2	2.01	5.15	0.16	2.56219	153.731	First-line treatment	Targeted therapy	18months		540	0	Peak	5years	Peak
1	elevated group	272	Male	50	Adenocarcinoma			I	1		2021-08-01	311	9.9	11	1.64	6.55		3.9939	189.634	Post-operative period		/		0	0
1	elevated group	273	Male	73	Squamous			III	3		2021-11-19	308	12.1	15.5	0.77	2.07	2.05	2.68831	400	First-line treatment	Antiangiogenesis+Chemo+Immuno	30 months		900	0	Fluctuation	2years3months	Fluctuation
1	elevated group	274	Male	65	Adenocarcinoma			I	1		2021-08-16	316	10	11.2	1.35	2.11	1.17	1.56296	234.074	Adjuvant treatment	Adjuvant chemotherapy		DFS 9months	0	270	Peak	2years6months	Peak
1	elevated group	275	Male	75	Adenocarcinoma			IV	4	Pleura	2018-02-05	308	10.5	12.6	3.32	4.95	0.39	1.49096	92.7711	Diagnosis				0	0
1	elevated group	276	Male	65	Squamous			I	1		2021-08-02	403	9.7	10.5	1.28	8.96	0.33	7	314.844	Diagnosis				0	0
1	elevated group	277	Female	45	Adenocarcinoma			I	1		2021-08-11	324	10	11.5	0.67	13.05		19.4776	483.582	Post-operative period		/		0	0
1	elevated group	278	Female	56	Adenocarcinoma	EGFR ex20ins		IV	4	Bone	2021-05-14	325	9.4	9.7	0.64	6.51		10.1719	507.812	Diagnosis	Targeted therapy	2 months 14 days		74	0	Fluctuation	8months	Fluctuation
1	elevated group	279	Male	74	Adenocarcinoma			II	2		2021-11-18	338	9.3	9.7	1.89	7	0.18	3.7037	178.836	Adjuvant treatment		/		0	0
1	elevated group	280	Male	70	NSCLC		TPS 70%	III	3		2020-12-15	313	8.8	9.6	1.11	7.13	0.71	6.42342	281.982	Diagnosis	Chemotherapy	5months21days		171	0	Peak	15months	Peak
1	elevated group	281	Male	67	Adenocarcinoma		PDL1 1%	IV	4	Bone、Pleura	2021-08-09	385	9	9.2	1.24	6.98	2.58	5.62903	310.484	Diagnosis	Immunotherapy+ Chemo	/		0	0
1	elevated group	282	Male	71	Neuroendocrine			I	1		2021-10-06	425	9.1	10.5	1.41	3.68	0.4	2.60993	301.418	Adjuvant treatment	Adjuvant chemotherapy		DFS27months	0	810	Fluctuation	2years3months	Fluctuation
1	elevated group	283	Male	53	Adenocarcinoma			IV	4	Brain	2021-08-17	534	8.8	8.2	1.23	7.49	0.87	6.08943	434.146	Diagnosis				0	0
1	elevated group	284	Male	48	Adenocarcinoma	RET+	TPS 90%，	IV	4	Pleura	2020-11-05	355	9.1	10.5	0.97	6.01	0.59	6.19588	365.979	Diagnosis	Immunotherapy+ Chemo	2months17days		77	0	Fluctuation/Sustained40days	3years	Fluctuation
1	elevated group	285	Male	65	Adenocarcinoma			IV	4	Bone	2020-08-25	369	9.4	11	1.41	5.48	0.37	3.88652	261.702	Diagnosis	Chemotherapy	6months 5days		185	0	Fluctuation	3years4months	Fluctuation
1	elevated group	286	Male	67	SCLC			III	3		2021-03-14	383	9.1	9.8	1.08	3.13	1.18	2.89815	354.63	First-line treatment	Chemotherapy	5months12days		162	0	Fluctuation	2years	Fluctuation
1	elevated group	287	Male	59	Squamous			IV	4	Pleura	2021-09-09	309	8.9	8.6	1.09	3.78	0.44	3.46789	283.486	Diagnosis	chemoradiotherapy+immuno	28months20days		860	0	Fluctuation	2years3months	Fluctuation
1	elevated group	288	Male	57	Adenocarcinoma	21L858R		IV	4	Bone、Brain	2021-08-19	320	10.1	12.2	1.42	4.8	2.22	3.38028	225.352	Diagnosis	Targeted therapy+radiotherapy	4months18days		138	0	Fluctuation	5months	Fluctuation
1	elevated group	289	Male	75	SCLC			III	3		2021-09-13	381	8.8	8	1.44	4.39	0.64	3.04861	264.583	Diagnosis				0	0
1	elevated group	291	Male	72	Adenocarcinoma			II	2		2021-11-15	438	10.8	12.6	1.95	6.84	2.31	3.50769	224.615	Adjuvant treatment	Chemotherapy	/		0	0
1	elevated group	292	Male	73	Squamous		TPS 60%	III	3		2021-11-15	363	9.9	10.7	2.01	5.84	4.15	2.90547	180.597	First-line treatment	Immunotherapy	30months		900	0	Peak	2years1months	Peak
1	elevated group	293	Male	75	NSCLC			III	3		2021-11-10	345	9.9	10.6	0.87	4.79		5.50575	396.552	First-line treatment	Immunotherapy+ Chemo	28months		840	0	Fluctuation	30months	Fluctuation
1	elevated group	294	Male	68	Adenocarcinoma		TPS 97%	IV	4	Lung	2021-04-21	334	9.8	9.9	1.26	13.64	0.88	10.8254	265.079	Diagnosis	Antiangiogenesis+immuno	24months		720	0	Fluctuation	2years4months	Fluctuation
1	elevated group	295	Female	70	Adenocarcinoma	ROS1+		IV	4	Pleura	2021-10-21	356	10.2	11.6	1.28	6.39		4.99219	278.125	Diagnosis	Antiangiogenesis+Targeted therapy	28months		840	0	Peak	2years2months	Peak
1	elevated group	296	Male	74	SCLC			III	3		2023-09-20	374	8.9	8.9	1.6	5.4	1.35	3.375	233.75	Postoperative recurance				0	0
1	elevated group	297	Female	69	Adenocarcinoma	21L858r		IV	4	Bone	2021/11/18/	338	9.5	10	0.93	6.62	0.59	7.11828	363.441	First-line treatment	Targeted therapy	7months		210	0	Fluctuation	14months	Fluctuation
1	elevated group	298	Male	62	Squamous			III	3		2021-10-11	534	9.3	10.3	0.91	4.76	0.37	5.23077	586.813	Diagnosis	Immunotherapy+ Chemo	/		0	0
1	elevated group	299	Female	75	Adenocarcinoma	19del		IV	4	Lung	2022-08-29	333	9.6	9.4	0.67	4.62	1.22	6.89552	497.015	First-line treatment	Antiangiogenesis+Targeted therapy	13months		390	0	Peak	13months	Peak
1	elevated group	300	Male	48	Adenocarcinoma			IV	4	Pleura	2020-08-06	350	9.4	10.3	2.16	8.66	3.17	4.00926	162.037	First-line treatment	Chemotherapy	6months		180	0	Fluctuation	2years2months	Fluctuation
1	elevated group	301	Male	49	Adenocarcinoma	20del		IV	4	Pleura	2023-02-23	365	8.8	9.4	0.53	6.02	4.91	11.3585	688.679	progression after third-line or later treatment				0	0		1year6months
1	elevated group	302	Male	60	SCLC			IV	4	Adrenal gland	2021-12-04	431	9.5	9.8	0.53	4.43	1.08	8.35849	813.208	Second-line treatment				0	0
1	elevated group	303	Male	74	SCLC			IV	4	Brain	2021-11-25	454	10.1	11.1	1.69	11.02	1.59	6.52071	268.639	First-line treatment	chemoradiotherapy	6months		180	0	Peak/Sustained30days	8months	Peak
1	elevated group	304	Male	68	AdenocarcinomaSquamous			IB	1		2009-10-22	320	7.7	16	0.7	4		5.71429	457.143	Adjuvant treatment	Chemotherapy	/		0	0
1	elevated group	305	Male	71	Squamous		TPS 60%	IV	4	Pleura	2021-08-26	387	7.8	7.9	0.89	5.71	0.94	6.41573	434.831	Diagnosis				0	0
1	elevated group	306	Male	55	Squamous			III	3		2021-10-27	433	10.4	11.5	1.73	4.3	0.8	2.48555	250.289	Diagnosis	Antiangiogenesis+chemoradiotherapy	26months		780	0	Peak	2years1months	Peak
1	elevated group	307	Male	71	Adenocarcinoma			IV	4	Pleura	2021-11-08	314	9.4	10	1.86	6.22	3.62	3.34409	168.817	Diagnosis	Chemotherapy	3months 21days		111	0	Fluctuation	3months21days	Fluctuation
1	elevated group	308	Male	80	Adenocarcinoma			IV	4	Liver	2021-10-30	303	10.2	11.3	1.11	6	0.67	5.40541	272.973	Diagnosis				0	0
1	elevated group	309	Female	55	Adenocarcinoma	19del		II	2		2021-11-24	371	9.1	9.4	1.56	4.76	3.56	3.05128	237.821	Adjuvant treatment	Adjuvant chemotherapy		DFS＞1years 6months	0	0	Fluctuation	1year6months	Fluctuation
1	elevated group	310	Male	53	Adenocarcinoma	19del		IV	4	Bone	2018-10-13	317	9.9	11.8	2.31	5.29	0.2	2.29004	137.229	Diagnosis	Targeted therapy+Chemo	14months		420	0	Peak	4years10months	Peak
1	elevated group	311	Male	79	SCLC			IV	4	Bone	2022-02-14	308	9.2	9.1	0.64	2.44		3.8125	481.25	First-line treatment	chemoradiotherapy	27months		810	0	Peak	2years	Peak
1	elevated group	312	Female	64	Adenocarcinoma	21L858r	TPS 90%	IV	4	Bone	2021-11-06	351	10.3	11.6	1.46	7.12	0.92	4.87671	240.411	Diagnosis	Antiangiogenesis+Targeted therapy	5months25days		175	0	Peak/Sustained90days	9months	Peak
1	elevated group	313	Female	65	Adenocarcinoma			I	1		2021-11-16	318	10.3	11.9	1.91	4.38	0.7	2.29319	166.492	Diagnosis	Surgery			0	0
1	elevated group	314	Male	62	Adenocarcinoma			IV	4	Pleura、Liver	2021-12-03	387	9.6	10	0.76	13.63		17.9342	509.211	First-line treatment	Chemotherapy	6months		180	0	Peak	12months	Peak
1	elevated group	315	Male	57	Adenocarcinoma			IV	4	Brain	2021-12-08	327	9.4	10.1	1.7	9.06	0.42	5.32941	192.353	First-line treatment	Immunotherapy+ Chemo	28months		840	0	Peak	2years	Peak
1	elevated group	317	Male	49	SCLC			III	3		2019-04-01	363	9.7	11.1	2.39	4.62	0.5	1.93305	151.883	Diagnosis	chemoradiotherapy	18months		540	0	Fluctuation	20months	Fluctuation
1	elevated group	318	Female	59	Adenocarcinoma			I	1		2021-11-08	351	9.4	9.7	1.83	4.42	0.1	2.4153	191.803	Diagnosis	Surgery			0	0
1	elevated group	319	Male	59	Adenocarcinoma			III	3		2021-11-29	420	9.4	10	1.43	10.5	1.19	7.34266	293.706	Diagnosis				0	0
1	elevated group	320	Male	57	Adenocarcinoma			IV	4	Bone	2021-11-29	362	9.1	9.9	1.6	4.97	0.22	3.10625	226.25	Diagnosis				0	0
1	elevated group	321	Female	59	Adenocarcinoma			IV	4	Brain、Lung、Bone	2022-09-06	311	9.5	9.2	1.08	3.02	0.73	2.7963	287.963	progression after third-line or later treatment				0	0
1	elevated group	322	Male	69	Squamous			IV	4	Lung	2021-12-02	300	9.3	9.6	1.3	2.9	0.27	2.23077	230.769	Diagnosis				0	0
1	elevated group	323	Male	72	Adenocarcinoma			IV	4	Bone	2022-01-27	304	9.5	11.2	1.81	5.34		2.95028	167.956	Diagnosis	Immunotherapy+ Chemo	26months		780	0	Fluctuation	34months	Fluctuation
1	elevated group	324	Female	36	Adenocarcinoma	EGFR ex20ins		I	1		2021-12-14	306	10.9	12.3	1.55	3.98		2.56774	197.419	Diagnosis	Adjuvant chemotherapy		DFS＞2years	0	0	Fluctuation	2years	Fluctuation
1	elevated group	325	Male	73	Adenocarcinoma			IV	4	Pleura	2021-12-06	312	8.4	7.7	1.78	3.79	3.44	2.12921	175.281	Diagnosis	Immunotherapy+ Chemo	10months13days		313	0	Fluctuation	11months	Fluctuation
1	elevated group	326	Male	57	SCLC			IV	4	Liver、Bone	2021-12-08	320	8.8	9	0.69	3.68	5.41	5.33333	463.768	progression after third-line or later treatment				0	0
1	elevated group	328	Male	62	Squamous			IV	4	Bone	2021-12-25	389	9.8	10.5	0.65	4.84	0.67	7.44615	598.462	Diagnosis	Immunotherapy+ Chemo			0	0
1	elevated group	329	Male	64	Adenocarcinoma			Postoperative recurance	Postoperative recurance		2021-12-11	303	8.7	8.3	1.44	4.86		3.375	210.417	First-line treatment	Immunotherapy+ Chemo	27months		810	0	Fluctuation	30months	Fluctuation
1	elevated group	330	Male	72	Squamous			III	3		2021-12-15	324	9.7	10.6	1.3	6.13		4.71538	249.231	Adjuvant treatment				0	0
1	elevated group	331	Male	72	SCLC			IV	4	Bone	2021-12-21	323	9.9	10.8	1.5	8.73	0.48	5.82	215.333	First-line treatment	chemoradiotherapy+immuno	9months		270	0	Fluctuation	11months	Fluctuation

## Sheet: 阴性对照
Group number	Group	Serial number	Gender	Age	Histology	Mutation	PDL1	Stage	Staging figure	Metastatic site	Elevated time	Count	MPV	PDW	lymphocyte	neutrophil	D-dimer	NLR	PLR	Treatment	PFS	DFS	PFS/days
0	Negative control	1	Male	66	NSCLC			Ⅲ	3			249	9	10.3	1.95	4.71	1.1	2.41538	127.692	Antiangiogenesis+chemoradiotherapy	1year11months		695
0	Negative control	2	Male	70	SCLC			Ⅳ	4	Liver		161	10.3	13.1	2.25	4.28	0.22	1.90222	71.5556	chemotherapy	10months14days		314
0	Negative control	3	Male	56	Adenocarcinoma		TPS5%(+)	Ⅲ	3			239	9.9	11.5	1.17	4.44	0.15	3.79487	204.274	chemotherapy	8months		240
0	Negative control	4	Male	78	Squamous		TPS20%/ CPS40%	Ⅳ	4	Lung		214	11.7	15.6	0.88	3.36	0.18	3.81818	243.182	immuno	8months20days		260
0	Negative control	5	Female	68	Adenocarcinoma			Ⅳ	4	Lung		234	10.9	14.3	1.69	5.28	0.21	3.12426	138.462	chemotherapy	1year6months		545
0	Negative control	6	Male	63	SCLC			ⅢB	3			76	9.7	10.4	0.74	2.56	0.59	3.45946	102.703	chemoradiotherapy	6months		180
0	Negative control	7	Male	73	Squamous			IV	4	Bone		236	11	13.3	1.52	5.3	0.31	3.48684	155.263	Antiangiogenesis+chemoradiotherapy	3years6months		1275
0	Negative control	9	Male	65	Squamous			ⅢA	3			260	10.6	13	2.56	5.21	0.29	2.03516	101.562	chemotherapy+immuno	18months16days		556
0	Negative control	10	Female	54	Adenocarcinoma			Ⅲ	3			191	10.5	12.8	1.51	3.09	0.33	2.04636	126.49	Surgery		9months	0
0	Negative control	11	Female	66	Adenocarcinoma	19del		Ⅳ	4	Bone、Brain		271	9.4	11.1	1.26	4.82	0.74	3.8254	215.079	Targeted therapy	8months25days		265
0	Negative control	12	Female	76	Adenocarcinoma			Ⅰ	1			158	11	15.4	1.75	4.81	0.2	2.74857	90.2857	Surgery		1year6months	0
0	Negative control	13	Male	66	Squamous			Ⅳ	4	Adrenal gland		204	11	14.4	1.18	4.83	0.28	4.09322	172.881	chemotherapy+immuno	10months		300
0	Negative control	14	Female	63	Adenocarcinoma	21L861QM		Ⅳ	4	Bone		217	11.8	15.3	1.73	4.15	0.13	2.39884	125.434	Targeted therapy+radiotherapy	2years10months		1030
0	Negative control	15	Male	66	Adenocarcinoma	L858R		Ⅳ	4	Lymph node		164	11.3	14.2	2.48	4.13	0.29	1.66532	66.129	Targeted therapy	7months		210
0	Negative control	16	Male	49	Adenocarcinoma	19del		ⅢC	3			210	9.5	11.3	1.66	3.41	0.1	2.05422	126.506	Targeted therapy	1year7months		575
0	Negative control	17	Male	53	Adenocarcinoma			Ⅳ	4	Bone		144	12.6	17.7	0.76	2.7	1.8	3.55263	189.474	Antiangiogenesis+immuno+chemotherapy	1year4months20days		505
0	Negative control	18	Male	79	Adenocarcinoma			Ⅳ	4	Pleura		194	11	13.9	1.01	4.74	0.9	4.69307	192.079	Antiangiogenesis+radiotherapy	7months10days		220
0	Negative control	19	Male	62	SCLC			Ⅳ	4	spleen		184	10.2	11.6	1.49	5.94	1.31	3.98658	123.49	chemotherapy	11months11days		341
0	Negative control	20	Male	78	Adenocarcinoma	L858R		Ⅳ	4	Pleura		229	9.5	10.5	1.14	4.22	0.36	3.70175	200.877	Antiangiogenesis+Targeted therapy	19months19days		589
0	Negative control	21	Male	62	SCLC			Ⅳ	4	Bone		203	8.8	10.1	0.74	5.32	0.46	7.18919	274.324	chemoradiotherapy	7months13days		223
0	Negative control	22	Female	65	Adenocarcinoma	L858R	TPS70%	Ⅳ	4	Bone、Lung		174	14.4	21.9	1.17	7.62	0.71	6.51282	148.718	Antiangiogenesis+Targeted therapy	5months11days		161
0	Negative control	23	Female	60	Adenocarcinoma	L858R		Ⅳ	4	Bone		214	10.4	12.3	1.67	3.61	0.29	2.16168	128.144	Targeted therapy	21months		630
0	Negative control	24	Male	65	Adenocarcinoma	19del		Ⅳ	4	Liver、Pleura		246	9.9	11	0.8	8.17	8.11	10.2125	307.5	Targeted therapy	8months		240
0	Negative control	25	Male	78	Squamous		TPS50%	Ⅱ	2			193	10	11.8	1.56	4.45	1.11	2.85256	123.718	immuno	15months		450
0	Negative control	26	Male	60	Adenocarcinoma	19del	TPS80%	Ⅳ	4	Lung、Pleura		235	9.6	10.5	1.52	5.23	1.34	3.44079	154.605	chemotherapy+Targeted therapy	16months9days		489
0	Negative control	27	Male	75	SCLC			IV	4	Lung		226	9.9	12	1.68	3.16	0.79	1.88095	134.524	chemotherapy	6months		180
0	Negative control	28	Male	72	Squamous			Ⅳ	4	Bone		143	12.2	15.9	1.35	4.64	0.37	3.43704	105.926	chemotherapy+immuno	6months13days		193
0	Negative control	29	Male	69	Squamous			Ⅳ	4	Liver		282	9.3	10.4	1.73	2.96	0.41	1.71098	163.006	Antiangiogenesis+chemotherapy	6months19days		199
0	Negative control	30	Male	77	SCLC			Ⅲ	3			144	11.3	12.3	1.14	3.7	0.35	3.24561	126.316	Antiangiogenesis+chemotherapy	1year11months		695
0	Negative control	31	Male	67	Adenocarcinoma			Ⅳ	4	Bone		294	10.6	12.9	3.29	25.61	1.45	7.78419	89.3617	Antiangiogenesis+chemotherapy	1year2months		425
0	Negative control	32	Female	65	Adenocarcinoma			Ⅰ	1			189	10.2	14	2	4.6	0.1	2.3	94.5	Surgery		2years9months24days	0
0	Negative control	33	Female	64	Adenocarcinoma			Ⅲ	3			143	10.4	11.6	0.62	3.34	0.22	5.3871	230.645	Surgery		3years8months	0
0	Negative control	34	Female	52	Adenocarcinoma			ⅠA3	1			270	11.2	14.4	1.95	2.72	0.19	1.39487	138.462	Surgery		5years5months	0
0	Negative control	35	Male	71	SCLC			Ⅳ	4	Liver、Bone		209	9.7	11.2	1.38	4.19	4.42	3.03623	151.449	chemotherapy	3months		90
0	Negative control	36	Male	68	SCLC			Ⅳ	4	Liver		199	11.3	16.1	1.66	3.83	0.42	2.30723	119.88	chemotherapy	4months		120
0	Negative control	37	Female	47	Adenocarcinoma	L858R		Ⅳ	4	Brain、Lung		276	11.6	14.8	1.79	3.04	0.38	1.69832	154.19	Targeted therapy	9months12days		282
0	Negative control	38	Male	70	Adenocarcinoma	18exonG719		Ⅳ	4	Pleura、Lymph node		197	10.9	13.4	1.81	4.56	0.29	2.51934	108.84	Targeted therapy	3years2months20days		1175
0	Negative control	39	Male	85	SCLC			Ⅳ	4	Bone		221	9.9	10.7	0.78	4.72	1.58	6.05128	283.333	chemoradiotherapy	10months		300
0	Negative control	40	Male	71	NSCLC			Ⅳ	4	Bone		119	11.9	15.1	1.14	2.87	0.56	2.51754	104.386	chemotherapy+immuno	1year4months16days		501
0	Negative control	41	Male	61	Adenocarcinoma	19del		ⅢA	3			176	11.7	13.9	1.95	6	0.94	3.07692	90.2564	Surgery		1year3months25days	0
0	Negative control	42	Female	79	Adenocarcinoma	19del		Ⅳ	4	Pleura		180	11.1	14.6	1.66	4.59	2.71	2.76506	108.434	Targeted therapy	1year		365
0	Negative control	43	Female	60	Adenocarcinoma			Ⅳ	4	Pleura		198	11.1	13.7	2.65	2.31	0.6	0.871698	74.717	chemotherapy	2years7months		940
0	Negative control	44	Male	47	Adenocarcinoma	ALK(+)		Ⅳ	4	Liver、Bone		295	9.1	9.4	1.1	6.81	0.68	6.19091	268.182	Targeted therapy	1year10months		665
0	Negative control	45	Male	73	Squamous			Ⅳ	4	Pleura、Lymph node		232	9.6	9	0.82	4.83	2.36	5.89024	282.927	chemotherapy	10months17days		317
0	Negative control	46	Male	70	Adenocarcinoma			Ⅳ	4	Liver、Bone		220	9.6	11.6	1.37	3.74	0.26	2.72993	160.584	Antiangiogenesis+immuno+chemotherapy	9months3days		273
0	Negative control	47	Male	51	Adenocarcinoma			Ⅳ	4	Bone		292	10.4	13	1.53	3.64	1.03	2.37908	190.85	chemotherapy+immuno	10months20days		320
0	Negative control	48	Male	67	Adenosquamous			Ⅲ	3			270	9.5	10.5	1.04	5.24	0.35	5.03846	259.615	chemotherapy+immuno	1year2months		425
0	Negative control	49	Male	44	SCLC			Ⅲ	3			144	13.6	19.2	0.83	6.01	0.57	7.24096	173.494				0
0	Negative control	50	Male	75	Adenocarcinoma	L858R		Ⅳ	4	Pleura		180	10.9	12.6	1.38	4.39	0.62	3.18116	130.435				0
0	Negative control	52	Male	69	Squamous			Ⅲ	3			172	13.2	18.5	1.19	15.85	2.09	13.3193	144.538				0
0	Negative control	53	Male	69	Squamous			Ⅳ	4	Liver、Bone		238	12	15.7	1.32	5.98	2.25	4.5303	180.303	chemoradiotherapy	2months11days		71
0	Negative control	54	Female	83	Adenocarcinoma			ⅡB	2			207	10.6	12.8	1.36	4.58	0.32	3.36765	152.206				0
0	Negative control	55	Male	81	Squamous		PDL1 55%	Ⅲ	3			236	9.4	9.5	0.82	5.39	0.75	6.57317	287.805	immuno	1year10months14days		679
0	Negative control	57	Male	70	Adenocarcinoma			Ⅱ	2			167	10	11.6	1.95	2.95	0.41	1.51282	85.641				0
0	Negative control	58	Male	67	SCLC			Ⅳ	4	Brain		230	9.8	10.7	1.64	4.93	2.21	3.0061	140.244				0
0	Negative control	59	Male	67	SCLC			Ⅳ	4	Liver、Bone		236	9.8	11.1	2.48	7.79	4.6	3.14113	95.1613				0
0	Negative control	61	Male	62	Adenocarcinoma	19del		Ⅲ	3			127	11.8	16.3	1.12	3.32	0.44	2.96429	113.393	Targeted therapy	1year		365
0	Negative control	62	Female	53	Adenocarcinoma			ⅢA	3			253	10.9	13.5	1.34	3.06	0.4	2.28358	188.806				0
0	Negative control	63	Male	69	SCLC			IV	4	Liver、Bone		260	9.4	9.6	2.37	3.29	0.42	1.38819	109.705	chemotherapy+immuno	6months26days		206
0	Negative control	64	Male	75	Adenocarcinoma		PDL1 60%	ⅡB	2			223	10.4	11.5	0.61	4.69	0.82	7.68852	365.574	chemotherapy+immuno	1year4months21days		506
0	Negative control	65	Male	79	Squamous			ⅢA	3			207	9.8	10.6	1.06	4.71	0.24	4.4434	195.283	chemoradiotherapy+immuno	2years5months		880
0	Negative control	66	Male	64	Squamous			Ⅲ	3			175	11.1	14.1	1.53	4.14	0.62	2.70588	114.379				0
0	Negative control	67	Male	70	Adenocarcinoma			Ⅳ	4	Bone		239	10.4	12.2	1.05	5.14	3.95	4.89524	227.619				0
0	Negative control	68	Female	56	Adenocarcinoma			ⅡB	2			205	10.4	11.5	1.87	2.29	0.16	1.2246	109.626				0
0	Negative control	69	Male	76	Squamous			Ⅳ	4	Pleura		205	10.4	12.4	1.17	7.54	0.59	6.44444	175.214	chemotherapy+Targeted therapy	1year5months17days		532
0	Negative control	70	Female	62	Adenocarcinoma			Ⅳ	4	Bone		273	9.8	11.9	1.71	3.84	0.42	2.24561	159.649	chemotherapy	1year		365
0	Negative control	71	Female	70	SCLC			Ⅲ	3			173	10.5	13	0.89	1.93	0.82	2.16854	194.382				0
0	Negative control	73	Male	72	Squamous			ⅡB	2			169	9.8	10.3	1.4	4.45	0.28	3.17857	120.714	chemoradiotherapy	2years9months		1000
0	Negative control	74	Female	71	Adenocarcinoma	19del		Ⅳ	4	Bone、Brain		230	10	11.4	2.06	6.08	0.71	2.95146	111.65				0
0	Negative control	75	Male	74	Adenocarcinoma			Ⅳ	4	Bone		222	10.3	11.8	1.53	2.7	0.19	1.76471	145.098				0
0	Negative control	76	Female	62	NSCLC			Ⅱ	2			216	9.6	10.4	2.2	2.53	1.76	1.15	98.1818				0
0	Negative control	78	Female	81	Adenocarcinoma			ⅢA	3			255	10.4	11.9	1.27	5.43	3.31	4.27559	200.787				0
0	Negative control	79	Female	76	Adenocarcinoma	19del		Ⅳ	4	Bone、Brain		40	12.8	21.3	1.2	1.9	0.77	1.58333	33.3333	Targeted therapy	1year4months		485
0	Negative control	81	Female	61	NSCLC			Ⅳ	4	Liver		290	11.5	14.1	1.49	3.56	0.87	2.38926	194.631				0
0	Negative control	82	Male	63	Adenocarcinoma			ⅢA	3			191	9.4	10.7	2.33	3.52	0.1	1.51073	81.9742				0
0	Negative control	83	Male	52	Adenocarcinoma		TPS 70%	Ⅳ	4	Bone、Brain、Adrenal gland		211	9.9	11.8	1.75	6.3	1.09	3.6	120.571				0
0	Negative control	84	Male	83	SCLC			Ⅳ	4	Liver		237	9.1	9.1	1.21	5.38	1.38	4.44628	195.868				0
0	Negative control	85	Male	58	Adenocarcinoma			Ⅱ	2			172	11.2	13.1	1.23	2.91	0.1	2.36585	139.837	Surgery		10months10days	0
0	Negative control	86	Female	61	Adenocarcinoma			Ⅲ	3			217	12.1	14.9	2.18	4.08	0.54	1.87156	99.5413				0
0	Negative control	87	Male	59	Adenocarcinoma			ⅡB	2			189	9.6	9.6	1.47	2.07	1.44	1.40816	128.571	chemoradiotherapy	2years1month		760
0	Negative control	88	Male	77	NSCLC			Ⅳ	4	Bone、Pleura、Adrenal gland		185	10.1	10.2	0.48	3.74	3.85	7.79167	385.417				0
0	Negative control	90	Male	62	Squamous		CPS=5	Ⅳ	4	Lymph node		286	9.4	10.2	1.34	4.13	2	3.08209	213.433	chemotherapy+immuno	1year3months13days		468
0	Negative control	91	Male	75	NSCLC			ⅠB	1			209	10	11.3	1.19	4.44	1.41	3.73109	175.63				0
0	Negative control	92	Male	58	Adenocarcinoma		TPS 20%	Ⅳ	4	Adrenal gland		289	11.2	12.9	2.23	5.2	0.66	2.33184	129.596	chemotherapy+immuno	1year		365
0	Negative control	93	Male	64	SCLC			ⅢA	3			194	11.6	13.8	2.37	4.44	0.23	1.87342	81.8565				0
0	Negative control	94	Female	77	SCLC			Ⅳ	4	Liver		177	11.6	15.2	1.37	6.67	2.24	4.86861	129.197				0
0	Negative control	96	Male	43	SCLC			IV	4	Bone		248	9.6	10.5	1.51	3.46	0.15	2.29139	164.238	chemoradiotherapy	6months16days		196
0	Negative control	97	Female	69	Adenocarcinoma			ⅡB	2			210	10.3	12.1	1.82	3.12	0.37	1.71429	115.385	Surgery		2years11months10days	0
0	Negative control	98	Female	74	Squamous	19del		Ⅳ	4	Bone		175	11.4	13.3	1.21	16.19	6.29	13.3802	144.628				0
0	Negative control	100	Female	76	Adenocarcinoma			Ⅳ	4	Brain		255	10.5	11.7	1.59	3.9	0.72	2.45283	160.377				0
0	Negative control	101	Male	70	Adenocarcinoma	19del		Ⅳ	4	Pleura		184	9.4	10.8	1.33	3.03	0.45	2.2782	138.346	Targeted therapy	2years5months		880
0	Negative control	102	Female	81	Squamous		TPS 5%	Ⅲ	3			121	13.1	19.3	0.9	3.17	0.65	3.52222	134.444				0
0	Negative control	103	Male	75	Squamous			Ⅳ	4	Pleura		210	9.3	9.5	1.32	9.5	1.61	7.19697	159.091				0
0	Negative control	104	Female	51	Adenocarcinoma	19del		Ⅳ	4	Lung		154	11.1	13.6	1.28	2.47	0.25	1.92969	120.312				0
0	Negative control	105	Male	65	NSCLC			Ⅲ	3			288	9.2	9.9	1.44	6.15	2.02	4.27083	200				0
0	Negative control	107	Male	67	Low-differentiated			Ⅳ	4	Brain、Bone		173	11.9	14.9	1.77	5.33	0.5	3.0113	97.7401	Antiangiogenesis+chemotherapy	1year3months		455
0	Negative control	109	Male	72	SCLC			Ⅳ	4	Liver、Lung、Bone		274	9.6	10	1.03	3.3	1.89	3.20388	266.019	chemotherapy+immuno	5months18days		168
0	Negative control	110	Female	73	Adenocarcinoma			Ⅳ	4	Pleura		196	12.3	16	1.59	3.23	0.3	2.03145	123.27				0
0	Negative control	111	Male	50	Squamous			Ⅳ	4	Bone		299	8.2	8.2	1	3.41	0.2	3.41	299				0
0	Negative control	113	Male	73	Squamous			ⅡB	2			193	9.8	12.1	2.84	5.32	0.21	1.87324	67.9577	Antiangiogenesis+chemoradiotherapy	9months		270
0	Negative control	114	Male	58	Adenocarcinoma		TPS 20%	Ⅲ	3			252	11.1	13.8	4	7.27	0.51	1.8175	63				0
0	Negative control	115	Male	62	Squamous			Ⅲ	3			218	9.9	10.9	1.16	4.49	1.01	3.87069	187.931				0
0	Negative control	116	Female	66	Adenocarcinoma			ⅠB	1			83	15.2	24	0.61	9.31	1.13	15.2623	136.066				0
0	Negative control	117	Male	77	Adenocarcinoma			Ⅲ	3			140	10.9	12.8	0.89	3.04	6.1	3.41573	157.303	chemotherapy	11months14days		344
0	Negative control	118	Male	65	Squamous			ⅢB	3			260	10.4	12.1	2.07	3.7	0.14	1.78744	125.604	chemotherapy+immuno	1year11months20days		715
0	Negative control	120	Male	45	Adenocarcinoma			Ⅱ	2			270	10.9	13	2.08	4.64	0.1	2.23077	129.808				0
0	Negative control	122	Male	64	Adenocarcinoma			Postoperative recurrence	Postoperative recurrence			135	11.5	14.3	0.71	1.93	0.15	2.71831	190.141				0
0	Negative control	123	Male	77	Squamous			III	3			242	10.7	12.6	1.58	6.16	0.92	3.89873	153.165	Antiangiogenesis+chemoradiotherapy	7months		210
0	Negative control	124	Female	54	SCLC			Ⅳ	4	Lung		181	11	13.2	0.65	6.3	0.35	9.69231	278.462				0
0	Negative control	125	Female	70	Adenocarcinoma	19del		ⅢB	3			196	11.1	13.6	1.66	5.21	0.33	3.13855	118.072	chemotherapy+Targeted therapy	1year6months11days		556
0	Negative control	126	Male	78	Squamous			Ⅲ	3			298	10.5	11.1	1.79	6.32	1.53	3.53073	166.48				0
0	Negative control	127	Female	59	Adenocarcinoma			Ⅱ	2			196	11.2	14.6	1.05	3.68	0.36	3.50476	186.667	Surgery		1year4months18days	0
0	Negative control	129	Female	56	Adenocarcinoma	19del		Ⅳ	4	Lung		234	12.4	16.9	1.26	4.75	0.21	3.76984	185.714	chemotherapy+Targeted therapy	11months		330
0	Negative control	130	Male	57	Adenocarcinoma			Ⅳ	4	Pleura		217	10.9	12.3	1.67	5.31	0.45	3.17964	129.94				0
0	Negative control	131	Male	66	Adenocarcinoma			ⅠB	1			129	11.6	17.1	2.14	8.12	0.25	3.79439	60.2804	Surgery		11months19days	0
0	Negative control	132	Female	51	Adenocarcinoma	19del		Ⅳ	4	Bone		144	11.9	16.3	1.47	4.73	3.12	3.21769	97.9592	Targeted therapy	1year3months20days		475
0	Negative control	133	Male	50	Adenocarcinoma			ⅡB	2			138	11.2	14.5	1.9	4.75	0.13	2.5	72.6316	Surgery		3years10months	0
0	Negative control	134	Male	65	SCLC			Ⅲ	3			198	7.9	8.1	1.44	3.73	0.21	2.59028	137.5	chemoradiotherapy	8months7days		247
0	Negative control	136	Male	57	Adenocarcinoma		TPS 10%	Ⅳ	4	Adrenal gland		153	10.6	12.3	2.13	2.41	0.49	1.13146	71.831				0
0	Negative control	137	Male	62	Squamous			Ⅲ	3			188	10.4	12.3	1.34	4.85	1.68	3.6194	140.299				0
0	Negative control	138	Male	56	Adenocarcinoma			Ⅱ	2			180	9.9	9.8	1.26	3.8	0.19	3.01587	142.857	Surgery		1year2months22days	0
0	Negative control	139	Male	54	Adenocarcinoma	L858R		Ⅳ	4	Bone、Pleura		278	9.9	11.1	1.85	3.99	0.47	2.15676	150.27				0
0	Negative control	140	Female	57	Adenocarcinoma	L858R		Ⅳ	4	Lung		105	13.2	17.2	1.49	5.02	0.52	3.36913	70.4698	Targeted therapy	2years1month20days		780
0	Negative control	141	Female	71	Adenocarcinoma	19del		Ⅳ	4	Pleura		231	10.7	12	2.06	2.06	0.77	1	112.136				0
0	Negative control	142	Female	71	Adenocarcinoma			ⅢB	3			260	9.5	10.7	1.57	2.77	0.39	1.76433	165.605				0
0	Negative control	143	Female	48	SCLC			ⅡB	2			155	13	21.8	1.26	3.14	0.15	2.49206	123.016				0
0	Negative control	146	Female	56	Adenocarcinoma			Ⅳ	4	Bone		247	9.6	10.2	1.37	3.91	0.2	2.85401	180.292	Antiangiogenesis+chemotherapy	1year2months		425
0	Negative control	150	Female	63	Adenocarcinoma			ⅡB	2			136	10.9	14	1.31	2.68	0.87	2.0458	103.817				0
0	Negative control	157	Male	43	Adenocarcinoma	19del		Ⅱ	2			170	11.4	13.8	1.76	4.16	1.03	2.36364	96.5909	Surgery		5months15days	0
0	Negative control	159	Male	76	SCLC			Ⅳ	4	Pleura		140	12.2	16	1.39	2.43	0.87	1.7482	100.719	chemoradiotherapy	11months24days		354
0	Negative control	160	Male	58	SCLC			Ⅲ	3			72	12.5	15.9	1.49	1.72	0.58	1.15436	48.3221	chemoradiotherapy	8months		240
0	Negative control	161	Male	73	SCLC			Ⅳ	4	Bone		160	11.1	14.3	3.1	4.22	0.27	1.36129	51.6129	chemotherapy	4months19days		139
0	Negative control	162	Female	62	Adenocarcinoma	19del		Ⅳ	4	Lung、Brain		196	10.3	11.5	2.36	3.18	0.95	1.34746	83.0508	Antiangiogenesis+chemotherapy+Targeted therapy	2years7months		940
0	Negative control	163	Male	82	Squamous			ⅡB	2			281	9.2	9	2.31	3.48	0.22	1.50649	121.645				0
0	Negative control	164	Male	78	Squamous			ⅢB	3			231	10.2	11.1	3.47	4.21	0.5	1.21326	66.5706				0
0	Negative control	166	Male	57	SCLC			Ⅲ	3			178	11.3	14.1	1.28	5.61	0.19	4.38281	139.062	chemotherapy	8months2days		242
0	Negative control	167	Male	71	Squamous		PDL1＜1%	Ⅲ	3			228	8.1	8.1	2.51	4.14	0.26	1.6494	90.8367	chemotherapy+immuno	2years3months		820
0	Negative control	168	Male	66	SCLC			Ⅳ	4	Brain、Adrenal gland		172	11.2	14.3	1.2	5.39	0.77	4.49167	143.333	chemotherapy	10months6days		306
0	Negative control	169	Male	76	Squamous			Ⅳ	4	Bone		211	10.1	10.4	1.68	4.26	0.28	2.53571	125.595				0
0	Negative control	170	Female	60	Adenocarcinoma	ALK(+)		Ⅳ	4	Pleura		224	11.1	13.1	2.06	5.68	1.69	2.75728	108.738				0
0	Negative control	171	Female	69	Adenocarcinoma			Ⅲ	3			202	10.1	12.4	2	1.92	0.29	0.96	101	Surgery		6years5months	0
0	Negative control	172	Female	62	Adenocarcinoma			ⅡB	2			257	10.4	11.3	2.12	4.27	1.48	2.01415	121.226				0
0	Negative control	173	Female	27	Adenocarcinoma	19del		Ⅳ	4	Pleura		195	10	11.3	2.03	3.61	2.24	1.77833	96.0591				0
0	Negative control	174	Male	81	Squamous			Ⅲ	3			232	10.5	11.7	1.09	4.4	1.5	4.0367	212.844				0
0	Negative control	175	Female	54	Adenocarcinoma			Ⅱ	2			136	12.6	15.4	1.23	1.72	0.74	1.39837	110.569				0
0	Negative control	176	Female	53	Adenocarcinoma			Ⅲ	3			181	9.6	10.4	2.46	1.49	0.31	0.605691	73.5772	Surgery		2years1months	0
0	Negative control	178	Male	57	Adenocarcinoma	L858R her2 80%		Ⅳ	4	Bone		218	10.5	12.1	1.27	4.06	0.15	3.19685	171.654				0
0	Negative control	179	Male	64	SCLC			Ⅳ	4	Liver、spleen、Bone		297	11.5	15.6	2.07	7.64	0.63	3.69082	143.478				0
0	Negative control	181	Male	63	SCLC			Ⅲ	3			207	8.9	10	1.63	2.34	0.1	1.43558	126.994				0
0	Negative control	182	Male	70	Adenocarcinoma			Ⅲ	3			193	9.4	11.9	1.59	3.4	0.25	2.13836	121.384				0
0	Negative control	183	Female	54	Adenocarcinoma			Ⅰ	1			167	11.4	13.7	1.71	3.53	0.33	2.06433	97.6608				0
0	Negative control	184	Male	54	Adenocarcinoma	L858R		Ⅳ	4	Bone		264	7.2	16.1	1.1	4.7	0.1	4.27273	240				0
0	Negative control	185	Male	76	Adenocarcinoma			ⅢB	3			142	10.5	12.5	1.05	2.58	0.32	2.45714	135.238				0
0	Negative control	186	Male	67	Adenocarcinoma			Ⅳ	4	Bone		184	10.4	11.9	1.47	4.58	0.26	3.11565	125.17				0
0	Negative control	187	Male	56	Adenocarcinoma			Ⅰ	1			231	10.2	11.4	2.16	3.84	0.09	1.77778	106.944				0
0	Negative control	188	Male	66	Adenocarcinoma			Ⅰ	1			207	9.9	11.2	1.2	4.09	0.15	3.40833	172.5	Surgery		2years3months	0
0	Negative control	189	Female	29	Adenocarcinoma			Ⅰ	1			233	10.6	12.2	1.43	2.89	0.27	2.02098	162.937				0
0	Negative control	190	Male	68	Adenocarcinoma			Ⅲ	3			237	10.7	12.8	1.4	2.25	0.55	1.60714	169.286				0
0	Negative control	191	Female	69	Adenocarcinoma			Ⅳ	4	Bone、Brain		191	12.2	16.9	1.14	7.94	2.41	6.96491	167.544				0
0	Negative control	193	Male	67	Adenocarcinoma	19del		Ⅳ	4	Bone、Brain		215	10.6	12.2	1.27	5.84	2.31	4.59843	169.291	Targeted therapy	2years		730
0	Negative control	194	Female	66	Adenocarcinoma			Ⅰ	1			199	10.3	11.7	1.96	2.4	0.27	1.22449	101.531				0
0	Negative control	195	Male	70	Adenocarcinoma		TPS 90%	Ⅲ	3			184	13	18.7	1.94	5.6	0.47	2.8866	94.8454				0
0	Negative control	196	Male	73	Adenocarcinoma			Ⅳ	4	Adrenal gland		263	10.8	12.8	1.56	5.02	9.24	3.21795	168.59	chemotherapy+immuno	1year5months11days		526
0	Negative control	197	Male	71	Neuroendocrine			Ⅳ	4	Pleura、chest wall		187	9.7	9.5	0.75	2.36	14.28	3.14667	249.333	chemotherapy+immuno	9months14days		284
0	Negative control	198	Male	61	Adenocarcinoma			Ⅳ	4	Pleura		298	9.8	10.2	1.48	8.26	2.31	5.58108	201.351				0
0	Negative control	199	Female	54	Adenosquamous	L858R		Ⅳ	4	Lymph node		81	14.2	22.7	1.72	1.94	0.61	1.12791	47.093	Targeted therapy	11months7days		337
0	Negative control	200	Male	57	SCLC			Ⅳ	4	Lymph node		180	9.6	10.3	1.48	6.5	1.46	4.39189	121.622	chemotherapy	8months26days		266
0	Negative control	201	Male	75	NSCLC			Ⅳ	4	Brain		142	12.1	15.9	1.75	2.89	1.21	1.65143	81.1429				0
0	Negative control	202	Male	67	Adenocarcinoma			Ⅰ	1			132	11.7	14.2	1.65	3.51	0.53	2.12727	80	Surgery		2years5months	0
0	Negative control	203	Male	62	SCLC			Ⅲ	3			157	10.2	10.8	1.21	2.29	0.33	1.89256	129.752	chemotherapy	6months13days		193
0	Negative control	204	Male	49	SCLC			Ⅳ	4	Liver、Bone		251	8.9	8.9	0.73	3.28	0.98	4.49315	343.836				0
0	Negative control	205	Male	66	Adenocarcinoma			Ⅰ	1			146	10	12.5	1.29	2.85	0.1	2.2093	113.178				0
0	Negative control	206	Male	62	SCLC			Ⅳ	4	Lung		150	11.8	14.9	0.75	9.57	6.07	12.76	200	chemotherapy	1month17days		47
0	Negative control	207	Male	80	Squamous			Ⅳ	4	Pleura、Bone		225	9.6	10.2	1.8	4.82	0.57	2.67778	125				0
0	Negative control	209	Male	76	Squamous			Ⅱ	2			160	12.3	16.3	1.29	5.05	0.36	3.91473	124.031				0
0	Negative control	210	Male	61	Adenocarcinoma			Ⅳ	4	Bone		245	9.4	10.5	1.22	5.46	1.08	4.47541	200.82				0
0	Negative control	211	Male	71	SCLC			ⅢA	3			248	10	11.4	2.49	3.98	0.48	1.59839	99.5984	chemoradiotherapy	1year7months17days		592
0	Negative control	212	Male	69	NSCLC			Ⅳ	4	Lung		198	13	6.7	1.98	7.07		3.57071	100				0
0	Negative control	213	Male	83	Adenocarcinoma			Ⅳ	4	Lung		161	10.1	10.2	0.88	2.72	1.02	3.09091	182.955				0
0	Negative control	214	Male	72	Squamous			Ⅳ	4	Bone		163	11.2	13.2	2.61	4.81	4.42	1.84291	62.4521				0
0	Negative control	215	Female	74	Adenocarcinoma			Ⅳ	4	Pleura		101	11.4	14.3	0.7	2.28	0.3	3.25714	144.286	chemotherapy	5months8days		158
0	Negative control	217	Male	66	Adenocarcinoma			Ⅳ	4	Bone		106	9.5	9.4	1.64	5.23	0.7	3.18902	64.6341				0
0	Negative control	218	Female	61	SCLC			Ⅳ	4	Lung		228	9.7	11.2	2.58	3.59	0.4	1.39147	88.3721				0
0	Negative control	219	Male	68	Adenocarcinoma	19del		Ⅳ	4	Bone		156	11.6	15.8	1.3	4.13	1.06	3.17692	120	chemotherapy+Targeted therapy	1year4months13days		498
0	Negative control	220	Female	78	Adenocarcinoma	19del		Ⅳ	4	Bone		214	9.3	9.6	1.63	4.83	3.71	2.96319	131.288	Targeted therapy	9months11days		281
0	Negative control	221	Male	67	Squamous			ⅡB	2			196	10	11.5	1.57	3	0.3	1.91083	124.841	Surgery		1year	0
0	Negative control	222	Male	68	Adenocarcinoma			Ⅲ	3			149	9.9	10.9	1.5	2.08	3.28	1.38667	99.3333	chemotherapy	1year10months		665
0	Negative control	223	Male	71	Squamous			ⅢA	3			196	10.5	11.5	1.27	3.18	0.59	2.50394	154.331				0
0	Negative control	224	Male	57	Adenocarcinoma			Ⅲ	3			177	9.6	9.6	1.2	2.3	0.61	1.91667	147.5				0
0	Negative control	225	Female	65	Adenocarcinoma	19del		Ⅳ	4	Pleura		182	10.6	11.9	1.47	3.04	1.83	2.06803	123.81	Targeted therapy	1year6months22days		567
0	Negative control	226	Male	55	Squamous			Ⅱ	2			208	10.3	11.8	0.95	3.63	0.1	3.82105	218.947				0
0	Negative control	228	Male	68	Adenocarcinoma			Ⅳ	4	Bone、Brain		229	9.5	11.7	1.81	10.13	4.88	5.59669	126.519				0
0	Negative control	229	Male	71	Squamous		TPS 10%	Ⅳ	4	Bone		207	10.2	11.6	3.75	3.87	0.3	1.032	55.2	chemotherapy+immuno	9months17days		287
0	Negative control	230	Female	83	Adenocarcinoma			Ⅳ	4	Bone		143	12.4	15.6	1.01	3.26	0.27	3.22772	141.584				0
0	Negative control	231	Male	70	SCLC			Ⅳ	4	Pleura、Brain		293	10.1	12.3	1.36	4.98	0.37	3.66176	215.441				0
0	Negative control	233	Male	57	Adenocarcinoma			Ⅱ	2			227	11.5	14.3	2.78	3.36	0.11	1.20863	81.6547				0
0	Negative control	234	Male	70	SCLC			ⅢC	3			290	10.8	12.3	0.5	7.66	1.6	15.32	580	chemoradiotherapy	10months12days		312
0	Negative control	235	Male	68	Squamous		TPS 30%	III	3			221	10.8	12.3	1.68	4.72	0.44	2.80952	131.548	Surgery		7months19days	0
0	Negative control	236	Male	69	Adenocarcinoma	19del		Ⅳ	4	Lung		215	10.1	11.2	1.65	4.59	0.34	2.78182	130.303	Targeted therapy	1year5months		515
0	Negative control	237	Male	57	Squamous			Ⅳ	4	Lymph node		258	9	9.2	1.48	6.6	1.66	4.45946	174.324	chemoradiotherapy+immuno	6months		180
0	Negative control	238	Female	56	Adenocarcinoma			Ⅳ	4	Pleura		246	10.5	12.1	1.61	4.98	0.13	3.09317	152.795				0
0	Negative control	239	Female	71	Adenocarcinoma			Ⅳ	4	Bone		286	10.7	12.7	1.44	3.97	0.69	2.75694	198.611				0
0	Negative control	240	Male	73	SCLC			Ⅳ	4	Pleura		181	10.1	11.8	1.41	3.92	0.89	2.78014	128.369	chemotherapy	1year5months		515
0	Negative control	241	Male	48	Adenocarcinoma	L858R		Ⅳ	4	Bone		131	10.6	13.4	1.42	3.29	0.1	2.3169	92.2535	Targeted therapy	2years		730
0	Negative control	242	Female	87	Adenocarcinoma			Ⅳ	4	Pleura		289	10.3	11	0.69	7.78	2.35	11.2754	418.841				0
0	Negative control	243	Male	62	Adenocarcinoma			Ⅰ	1			125	11.5	13.6	1.5	2.91	0.23	1.94	83.3333				0
0	Negative control	244	Female	56	Adenocarcinoma			Ⅳ	4	Brain		181	9.4	9.7	1.15	2.89	0.28	2.51304	157.391				0
0	Negative control	245	Female	64	Adenocarcinoma	EGFR ex20ins		Ⅳ	4	Bone、Lung		280	11.6	14.3	1.05	7.11	0.68	6.77143	266.667	Antiangiogenesis+chemotherapy	9months		270
0	Negative control	246	Male	59	SCLC			Ⅲ	3			180	11.6	14.6	1.74	4.22	0.51	2.42529	103.448	chemotherapy	6months24days		204
0	Negative control	247	Female	65	SCLC			Ⅱ	2			276	9.2	8.9	1.78	3.18	0.18	1.78652	155.056				0
0	Negative control	248	Male	39	Adenocarcinoma			Ⅲ	3			242	10.4	12.5	2.67	6.56	0.21	2.45693	90.6367	Surgery		9months	0
0	Negative control	249	Female	74	Adenocarcinoma	L858R		Ⅲ	3			270	10.1	12	1.01	3.59	0.92	3.55446	267.327	Antiangiogenesis+Targeted therapy	1year6months		545
0	Negative control	250	Female	68	Adenocarcinoma			Ⅳ	4	Pleura		214	12.6	16.7	0.83	6.07	1.93	7.31325	257.831				0
0	Negative control	251	Male	78	SCLC			Ⅳ	4	Pleura、Bone		298	9.7	11.3	1.52	8.69	2.49	5.71711	196.053				0
0	Negative control	252	Female	61	Adenocarcinoma			Ⅱ	2			241	10.9	12.8	2.87	4.02	0.41	1.4007	83.9721				0
0	Negative control	254	Male	70	Adenocarcinoma			Ⅳ	4	Brain		180	10.9	11.4	1.28	4.26	1.7	3.32812	140.625	chemotherapy+immuno	1year8months		605
0	Negative control	255	Male	63	Adenocarcinoma	L858R		Ⅳ	4	Pleura		215	10.2	11.8	1.21	3.42	1.45	2.82645	177.686	Antiangiogenesis+Targeted therapy	1year6months		545
0	Negative control	256	Female	58	Adenocarcinoma			Ⅰ	1			203	11.8	15	1.74	2.81	0.13	1.61494	116.667	Surgery		7years	0
0	Negative control	257	Male	73	Squamous			Ⅱ	2			234	10.8	12.7	1.04	3.93	0.25	3.77885	225				0
0	Negative control	258	Male	84	Adenocarcinoma			Ⅳ	4	Bone		244	10.3	12	0.69	9.2	1.21	13.3333	353.623				0
0	Negative control	259	Female	74	Adenocarcinoma			Ⅱ	2			204	10	11.3	1.21	3.62	0.23	2.99174	168.595				0
0	Negative control	260	Male	60	Adenocarcinoma			Ⅳ	4	Pleura		292	10.3	11.6	1.34	5.75	4.4	4.29104	217.91				0
0	Negative control	261	Male	62	Adenocarcinoma			Ⅲ	3			183	9.8	12.1	1.2	4.7	0.2	3.91667	152.5				0
0	Negative control	262	Male	65	Squamous			III	3			282	9.6	10.4	1.48	4.43	6.54	2.99324	190.541	Surgery		11months	0
0	Negative control	263	Male	84	Squamous	19del		IV	4	Bone		287	10.3	11.4	0.93	9.19	0.91	9.88172	308.602	Targeted therapy	6months7days		187
0	Negative control	264	Female	57	Adenocarcinoma	19del		Ⅳ	4	Bone		173	11.9	14.3	1.49	3.38	0.02	2.26846	116.107	Targeted therapy	10months		300
0	Negative control	265	Female	65	Adenocarcinoma	19del		Ⅳ	4	Bone		202	10.1	12	2.03	2.25	0.3	1.10837	99.5074	Targeted therapy	2years5months27days		907
0	Negative control	266	Male	80	SCLC			Ⅳ	4	Pleura		169	10.7	11.9	0.57	5.11	0.4	8.96491	296.491				0
0	Negative control	267	Male	67	Squamous		TPS 30%	Ⅳ	4	Pleura		330	10.8	12.8	1.45	6.79	1.99	4.68276	227.586				0
0	Negative control	268	Female	54	Adenocarcinoma	19del		Ⅳ	4	Pleura		168	12.7	17.3	1.28	4.7	0.2	3.67188	131.25	Targeted therapy	6months22days		202
0	Negative control	269	Male	73	Squamous			Ⅳ	4	Pleura		135	12.3	16.5	2.45	3.79	0.18	1.54694	55.102				0
0	Negative control	270	Female	79	Adenocarcinoma	19del		Ⅳ	4	Pleura		135	12.9	20.1	1.01	2.11	0.53	2.08911	133.663				0
0	Negative control	272	Male	53	Adenocarcinoma	L858R		Ⅳ	4	Lung、Bone		237	11.1	12.9	1.86	7.14	0.22	3.83871	127.419	chemoradiotherapy+Targeted therapy	2years1month		760
0	Negative control	273	Male	60	Adenocarcinoma	19del		Ⅳ	4	Bone		248	10.1	11.1	1.02	5.6	0.78	5.4902	243.137				0
0	Negative control	274	Male	59	Adenocarcinoma			Ⅲ	3			171	10.4	11.8	2.02	7.4	3.91	3.66337	84.6535	Surgery		8months16days	0
0	Negative control	275	Male	66	SCLC			Ⅲ	3			223	11	14.1	2.81	3.02	0.41	1.07473	79.3594	chemotherapy	7months16days		226
0	Negative control	276	Male	68	Adenocarcinoma			Ⅳ	4	Pleura		274	9.8	10.6	0.79	3.41	0.37	4.31646	346.835				0
0	Negative control	277	Female	36	Adenocarcinoma			Ⅰ	1			233	12	14	1.42	2.04	＜0.1	1.43662	164.085				0
0	Negative control	279	Male	73	NSCLC			Ⅲ	3			104	10	10.4	1.46	1.41	0.68	0.965753	71.2329				0
0	Negative control	281	Male	79	Adenocarcinoma	19del		Ⅳ	4	Lung		213	10.2	11	2.03	4	6.62	1.97044	104.926				0
0	Negative control	282	Female	70	Adenocarcinoma			Ⅰb	1			202	12.4	17.1	2.1	3.72	0.98	1.77143	96.1905	Surgery		2years3months18days	0
0	Negative control	284	Female	77	Adenocarcinoma		TPS 5%	Ⅳ	4	Brain		202	9.9	10.9	1.05	7.35	0.45	7	192.381	Antiangiogenesis+chemotherapy	9months		270
0	Negative control	285	Male	57	SCLC		TPS 5%	Ⅳ	4	Bone、Adrenal gland		160	10.1	10.2	1.14	0.41	0.3	0.359649	140.351	chemotherapy	7months14days		224
0	Negative control	286	Male	69	Squamous			Ⅳ	4	Pleura		172	13.2	18.5	1.19	15.85	2.09	13.3193	144.538	chemotherapy+immuno	2years4months24days		874
0	Negative control	287	Female	81	Adenocarcinoma			Ⅳ	4	Bone		288	12.4	16.8	1.46	10.31	0.89	7.06164	197.26				0
0	Negative control	288	Female	66	Adenocarcinoma		TPS 5%	Ⅳ	4	Liver		224	11.1	13.1	1.17	15.64		13.3675	191.453				0
0	Negative control	290	Male	70	Squamous			Ⅳ	4	Lung		189	11.4	13.9	1.39	4.49	0.21	3.23022	135.971	Antiangiogenesis+immuno	8months8days		248
0	Negative control	291	Male	62	Adenocarcinoma	19del		Ⅳ	4	Pleura		175	9.5	9.4	0.83	2.82	0.5	3.39759	210.843	chemotherapy+Targeted therapy	4year1month10days		1500
0	Negative control	292	Male	69	Adenocarcinoma			Ⅳ	4	Liver		248	9.8	10.8	1.83	8.63		4.71585	135.519				0
0	Negative control	293	Male	74	SCLC			Ⅳ	4	Pleura		178	10.2	12	1.15	4.07	0.43	3.53913	154.783				0
0	Negative control	294	Male	58	Adenocarcinoma			Ⅲ	3			186	9.9	12.9	1.63	5.27	0.2	3.23313	114.11	Surgery		2years11months28days	0
0	Negative control	295	Female	67	Adenocarcinoma	19del		Ⅳ	4	Lung		205	10.2	12.9	1.36	3.05	0.37	2.24265	150.735	Targeted therapy	2years3months10days		830
0	Negative control	296	Female	76	Adenocarcinoma	L858R		Ⅳ	4	Pleura		404	10	11.4	1.04	5.58	1.96	5.36538	388.462	Targeted therapy	1year10months6days		671
0	Negative control	297	Female	70	Adenocarcinoma	L858R		Ⅳ	4	Bone		145	9.8	10.5	2.02	3.3	0.04	1.63366	71.7822	Targeted therapy	9months20days		290
0	Negative control	298	Male	63	Adenocarcinoma			Ⅳ	4	Bone		281	9.6	10.2	1.57	7.11	0.55	4.52866	178.981	chemotherapy	6months20days		200
0	Negative control	299	Female	75	Adenocarcinoma			Ⅳ	4	Pleura		195	12.6	16.7	0.98	4.47	3.98	4.56122	198.98				0
0	Negative control	300	Female	66	Adenocarcinoma	19del		Ⅳ	4	Pleura		207	10.5	12.1	2.34	2.64	7.34	1.12821	88.4615				0
0	Negative control	301	Female	66	Squamous			Ⅳ	4	Pleura		218	9.6	9.2	2.48	6.71		2.70565	87.9032				0
0	Negative control	303	Male	78	Squamous			Ⅳ	4	Pleura		139	11.8	14.3	0.98	3.84	0.19	3.91837	141.837				0
0	Negative control	304	Female	72	Adenocarcinoma			Ⅳ	4	Pleura		244	10.7	12.4	3.17	2.83	0.49	0.892744	76.9716				0
0	Negative control	305	Male	64	SCLC			Ⅳ	4	Liver、Bone、Esophagus and pancreas		128	9.7	10.2	2.1	3.64	0.84	1.73333	60.9524	chemotherapy+immuno	11months11days		341
0	Negative control	307	Male	60	Unkown			Ⅳ	4	Brain		226	10.1	11.3	1.9	2.77	1.09	1.45789	118.947				0
0	Negative control	308	Female	54	Adenocarcinoma			Ⅳ	4	Bone、Brain		142	12.7	16.8	2.22	6.64	1.03	2.99099	63.964	chemoradiotherapy	8months14days		254
0	Negative control	309	Male	55	Adenocarcinoma	19del		Ⅳ	4	Lung、Brain		216	9.7	11.7	1.43	6.16	1.79	4.30769	151.049	Targeted therapy	9months10days		280
0	Negative control	310	Female	68	Adenocarcinoma	L858R		Ⅳ	4	Lung		220	12.1	15.8	2.34	2.06	0.76	0.880342	94.0171	Targeted therapy	5months13days		163
0	Negative control	311	Male	74	Squamous			Ⅲ	3			266	9.1	8.9	1.2	6.6	0.83	5.5	221.667				0
0	Negative control	312	Male	67	Adenocarcinoma	L858R		ⅡB	2			104.2	10.7	13.2	1.21	3.19	0.65	2.63636	86.1157				0
0	Negative control	313	Male	60	SCLC			Ⅳ	4	Pleura		251	9.5	10.9	1.53	3.53	0.39	2.30719	164.052				0
0	Negative control	314	Female	57	Adenocarcinoma			Ⅱ	2			276	7.2	16.2	2.2	3.2		1.45455	125.455	Surgery		4years9months2days	0
0	Negative control	315	Female	55	Adenocarcinoma	19del		Ⅳ	4	Bone		142	12.2	15.8	0.85	4.04	4.9	4.75294	167.059	Targeted therapy	12months6days		366
0	Negative control	316	Female	50	Adenocarcinoma	L858R		Ⅳ	4	Bone		185	12.3	16.5	1.24	6.54	16.2	5.27419	149.194				0
0	Negative control	317	Male	55	Unkown	19del		Ⅳ	4	pericardium		189	8.9	8.9	0.8	10.52	2.35	13.15	236.25				0
0	Negative control	319	Male	53	SCLC			Ⅲ	3			208	11.7	14.3	2	3.82	0.9	1.91	104	chemotherapy	8months24days		264
0	Negative control	320	Female	71	Adenocarcinoma	L858R		Ⅳ	4	Pleura		111	12.7	17	0.86	2.67	3.27	3.10465	129.07	Antiangiogenesis+Targeted therapy	6months12days		192
0	Negative control	322	Female	67	Adenocarcinoma			Ⅲ	3			250	9	9.3	1.13	13.53	2.18	11.9735	221.239	Surgery		7months27days	0
0	Negative control	327	Female	62	NSCLC			Ⅳ	4	Lung		266	9.3	11.1	1.72	5.06	0.6	2.94186	154.651	chemotherapy	1year10months18days		683
0	Negative control	328	Female	83	Adenocarcinoma	19del		Ⅳ	4	Bone		152	11.5	14.1	1.03	2.61	6.12	2.53398	147.573				0
0	Negative control	330	Male	71	SCLC			Ⅳ	4	Bone		110	11.4	13.3	0.65	9.17	7.48	14.1077	169.231				0
0	Negative control	331	Male	67	Adenocarcinoma			Ⅱ	2			190	11.7	15.9	1.73	3.9	0.24	2.25434	109.827				0
0	Negative control	332	Female	62	Adenocarcinoma			Ⅳ	4	Brain		168	12.2	16.5	2.73	4.3	0.29	1.57509	61.5385				0
0	Negative control	334	Female	82	Adenocarcinoma			Ⅳ	4	Pleura		214	9.8	11	1.78	3.23	0.53	1.81461	120.225				0
0	Negative control	335	Male	47	Adenocarcinoma			Ⅳ	4	Bone、Brain		200	11.1	14.9	0.93	9.61	34.7	10.3333	215.054	chemoradiotherapy	8months11days		251
0	Negative control	336	Male	82	Neuroendocrine			Ⅳ	4	Pleura		238	10.5	12.6	1.58	4.59	0.22	2.90506	150.633	chemotherapy+immuno	8months		240
0	Negative control	338	Female	70	Adenocarcinoma	L858R		Ⅳ	4	Bone		244	10.4	11.5	1.33	3.3	0.37	2.4812	183.459				0
0	Negative control	343	Male	82	SCLC			Ⅳ	4	Bone		131	10	10.3	1.06	3.48	3.27	3.28302	123.585				0
0	Negative control	344	Male	58	Squamous			Ⅲb	3			210	12.9	17	1.65	13.36		8.09697	127.273				0
0	Negative control	345	Male	65	Adenocarcinoma	K-ras m		Ⅳ	4	Lung		230	11	13.5	1.1	14.5	12.69	13.1818	209.091	chemotherapy+immuno	3months5days		95
0	Negative control	347	Female	72	Adenocarcinoma			Ⅳ	4	Pleura		186	12.4	15.4	2.25	3.59	＜0.1	1.59556	82.6667	Targeted therapy	4years7months27days		1697
0	Negative control	348	Male	52	Adenocarcinoma			Ⅳ	4	Pleura		187	10	11.6	2.84	3.58	0.14	1.26056	65.8451	chemotherapy	2months		60
0	Negative control	349	Female	54	Adenosquamous			Ⅳ	4	Lymph node		78	14.2	15.1	1.72	1.94	0.61	1.12791	45.3488	Targeted therapy	10months3days		303
0	Negative control	351	Female	63	Adenocarcinoma			III	3			239	10	10.9	1.67	2.77	0.47	1.65868	143.114	Surgery		7months23days	0
0	Negative control	352	Male	63	Adenocarcinoma	EGFR 18		Ⅳ	4	Bone、Brain		127.4	14.14	23.6	1.68	4.55	0.23	2.70833	75.8333	chemotherapy	1year8months25days		630
0	Negative control	355	Male	57	Adenocarcinoma	19del		Ⅳ	4	Bone		207	13.5	18.1	1.51	3.46	2	2.29139	137.086	Targeted therapy	1year4months10days		495
0	Negative control	356	Male	67	SCLC			Ⅳ	4	Bone		250	9.9	10.8	1	8.24	0.58	8.24	250				0
0	Negative control	357	Male	57	SCLC			Ⅳ	4	Pleura		204	10.6	12.5	2.04	5.52	0.11	2.70588	100	chemoradiotherapy	7months25days		235
0	Negative control	358	Male	69	Adenocarcinoma			Ⅳ	4	Brain		175	11	13	1.98	4.06		2.05051	88.3838				0
0	Negative control	359	Male	81	Squamous			Ⅲ	3			186	9.8	11.2	1.78	3.52	1.33	1.97753	104.494				0
0	Negative control	360	Male	70	Adenocarcinoma	19del		IV	4	Pleura		162	10.7	12.4	1.66	9.9	0.19	5.96386	97.5904	Targeted therapy	10months		300
0	Negative control	363	Female	60	Adenocarcinoma			Ⅰa	1			268	9	9	1.62	2.84	0.23	1.75309	165.432				0
0	Negative control	364	Male	79	Adenocarcinoma			Ⅲc	3			243	9.5	9.2	0.81	5.38	5.59	6.64198	300				0
0	Negative control	365	Male	62	Squamous			Ⅲb	3			226	10.9	12.9	0.99	7.59	0.21	7.66667	228.283				0
0	Negative control	366	Female	64	Adenocarcinoma	19del		Ⅳ	4	Pleura		250	10.3	11.5	1.34	4.41	0.46	3.29104	186.567				0
0	Negative control	367	Male	70	Adenocarcinoma	EGFR 20		Ⅳ	4	Pleura		172	11.8	14.8	1.14	3.16	0.66	2.77193	150.877	Targeted therapy	9months10days		280
0	Negative control	368	Male	73	Adenocarcinoma			Ⅳ	4	Pleura		217	10.8	13.7	0.7	10.34	1.95	14.7714	310	chemotherapy+immuno	1year4months		485
0	Negative control	369	Female	60	Squamous			Ⅳ	4	Bone		201	10.1	10.8	1.73	3.3	0.32	1.90751	116.185	chemotherapy+immuno	2years1month8days		768
0	Negative control	372	Male	63	SCLC			Ⅳ	4	Lymph node		141	11.3	14.6	1.39	2.37	0.2	1.70504	101.439	chemotherapy	3months12days		102
0	Negative control	373	Male	67	Adenocarcinoma	L858R		Ⅳ	4	Bone、Brain		225	10.5	12.6	1.61	3.35	0.68	2.08075	139.752				0
0	Negative control	374	Female	58	Adenocarcinoma	L858R		Ⅳ	4	Brain		149	12.8	20	1.8	4.33	0.76	2.40556	82.7778	chemotherapy+Targeted therapy	6months16days		196
0	Negative control	375	Male	65	Adenocarcinoma			Ⅳ	4	Pleura		163	12.5	17.3	1.5	5.21	2.58	3.47333	108.667				0
0	Negative control	376	Male	78	Squamous			Ⅱa	2			268	10.5	12.1	1.69	4.45	0.19	2.63314	158.58				0
0	Negative control	377	Male	67	Adenocarcinoma			Ⅳ	4	peritoneum、Lymph node		244	11.2	14.4	1.18	8.72	0.31	7.38983	206.78				0
0	Negative control	379	Female	66	Adenocarcinoma	L858R		Ⅳ	4	Bone、Lung		252	9.2	9.7	1.43	3.41	1.71	2.38462	176.224				0
0	Negative control	381	Male	78	SCLC			Ⅲ	3			110	11.5	14.9	0.56	9.35	0.97	16.6964	196.429				0
0	Negative control	382	Male	78	Adenocarcinoma			Ⅳ	4	Bone		257	9.5	10.1	1.29	5.65	2.53	4.37984	199.225				0
0	Negative control	383	Female	56	NSCLC			Ⅳ	4	Pleura		165	11	12.4	0.98	4.03	0.26	4.11224	168.367				0
0	Negative control	384	Female	80	Adenocarcinoma			Ⅳ	4	Pleura		283	9.8	10.7	1.15	4.52	1.15	3.93043	246.087	Targeted therapy	1year10months25days		690
0	Negative control	385	Male	61	SCLC			Ⅳ	4	Pleura		255	9.4	10.2	1.4	4.25	0.37	3.03571	182.143				0
0	Negative control	386	Male	49	Adenocarcinoma		TPS 40%	Ⅳ	4	Bone		268	11.5	15.1	1.85	5.66	0.21	3.05946	144.865				0
0	Negative control	387	Male	73	SCLC			Ⅲa	3			205	9.6	11.2	1.2	4.59	0.6	3.825	170.833				0
0	Negative control	388	Male	62	Adenocarcinoma	L858R		Ⅰa	1			246	10.2	11.2	2.43	3.87	0.19	1.59259	101.235				0
0	Negative control	389	Female	54	Adenocarcinoma			Ⅰa	1			171	10.4	11.5	2.95	8.57		2.90508	57.9661				0
